# Supplementary material for: 38 低酸素下での気道抵抗負荷と呼吸困難感 : 気管支鏡検査時のシミュレーション(気管支鏡検査と低酸素血症)(第 16 回日本気管支学会総会)
Source: Royal Society of Chemistry journal article supplement (doi:10.1039/c4cc10084k), 1993-06-01

# **Support Information (SI)**

## **For**

### **Direct Cross Coupling of Benzyl Alcohols to Construct Diarylmethanes *via* Palladium Catalysis**

Zhi-Chao Cao, Da-Gang Yu, Ru-Yi Zhu, Jiang-Bo Wei, Zhang-Jie Shi\*

Beijing National Laboratory of Molecule Science (BNLMS) and Key Laboratory of Bioorganic Chemistry and Molecular Engineering of Ministry of Education, College of Chemistry and Green Chemistry Center, Peking University, Beijing, 100871(China); and State Key Laboratory of Organometallic Chemistry, Chinese Academy of Science, Shanghai, 200032 (China)

.....

#### **Table of Contents**

|                                                                                    |     |
|------------------------------------------------------------------------------------|-----|
| I. Experimental Section                                                            |     |
| Part 1. General Information .....                                                  | S2  |
| Part 2. Typical procedures for the benzylic Arylation.....                         | S2  |
| Part 3. Evidences of the weak interaction (naphthmethanol and phenylboroxine)..... | S3  |
| Part 4. Synthesis and analytical data for the products.....                        | S6  |
| II. Spectral data for new compounds.....                                           | S14 |

# I. Experimental Section

## Part 1. General Information

All the reactions were carried out under nitrogen atmosphere using standard Schlenk technique in the oil bath. 1-naphthylmethanol was purchased from Aldrich, (4'-(dimethylamino)biphenyl-4-yl)methanol was prepared directly from (4-bromophenyl)methanol.<sup>1</sup> Naphthalene-2,6-diyl dimethanol, 2-naphthylmethanol, phenanthren-9-ylmethanol, (6-methoxynaphthalen-2-yl)methanol, and 6-(hydroxymethyl)naphthalen-2-ol were prepared from corresponding aryl aldehydes or ketones.<sup>2</sup> 6-(hydroxymethyl)naphthalen-2-yl acetate was prepared from 6-(hydroxymethyl)naphthalen-2-ol via the reported procedure<sup>3</sup>. The catalyst Pd(PPh<sub>3</sub>)<sub>4</sub> was purchased from Acros and stored in the glovebox without further purification. THF was freshly distilled over sodium under N<sub>2</sub> with the use of diphenyl ketone as an indicator, aryl boronic acids were prepared from corresponding boric acid via the reported paths<sup>4</sup>. <sup>1</sup>H NMR (400 MHz)/<sup>13</sup>C NMR (100 MHz) were registered on Bruker 400 M spectrometers with CDCl<sub>3</sub> as solvent and tetramethylsilane (TMS) as internal standard. Chemical shifts were reported in units (ppm) by assigning TMS resonance in the <sup>1</sup>H spectrum as 0.00 ppm. All coupling constants (J values) were reported in Hertz (Hz). Column chromatography was performed on silica gel 200-300 mesh. MS and HRMS were performed by the State-authorized Analytical Center in Peking University.

## Part 2: Typical Procedure for Pd-catalyzed Cross-Coupling

An oven-dried Schlenk tube containing a stirbar was charged with 2-naphthylmethanol (**1a**) (31.7mg, 0.2 mmol) and (PhBO)<sub>3</sub> (62.4mg, 0.2 mmol) and removed into the glove box after the tube was degassed and refilled with N<sub>2</sub> for 3 times. The catalyst Pd(PPh<sub>3</sub>)<sub>4</sub> (23.1mg, 0.02 mmol) and THF (1.0 mL) were added in the glove box (Caution: the amount of oxygen is crucial to the yield) and then removed out and reacted in an oil bath. Then the mixture was cooled to room temperature and quenched by EtOAc (1 mL). The solvent was removed and the product was purified by flash column chromatography.

## Part 3. Evidences of the weak interaction

(naphthmethanol and phenylboroxine)

The mixture of naphthmethanol and phenylboroxine was detected by NMR and HRMS after heated at 80 °C with *d*<sup>8</sup>-THF as solvent for 12 h. From both <sup>1</sup>H NMR and <sup>13</sup>C NMR, we found that <sup>1</sup>H NMR and <sup>13</sup>C NMR signal of benzylic-CH<sub>2</sub> moved downfield in the presence of the phenylboroxine. And from the HRMS, we failed to get the value of the following possible benzyloboronic esters.

Scheme 1. Possible benzyloboronic ester

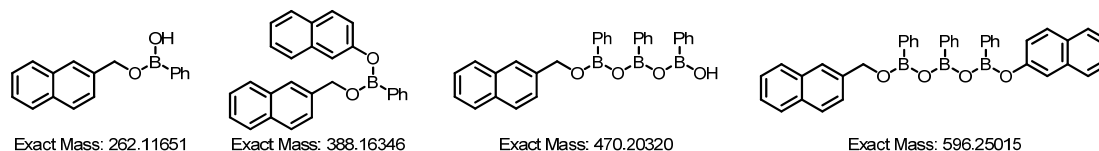

**All possible intermediates are excluded!**

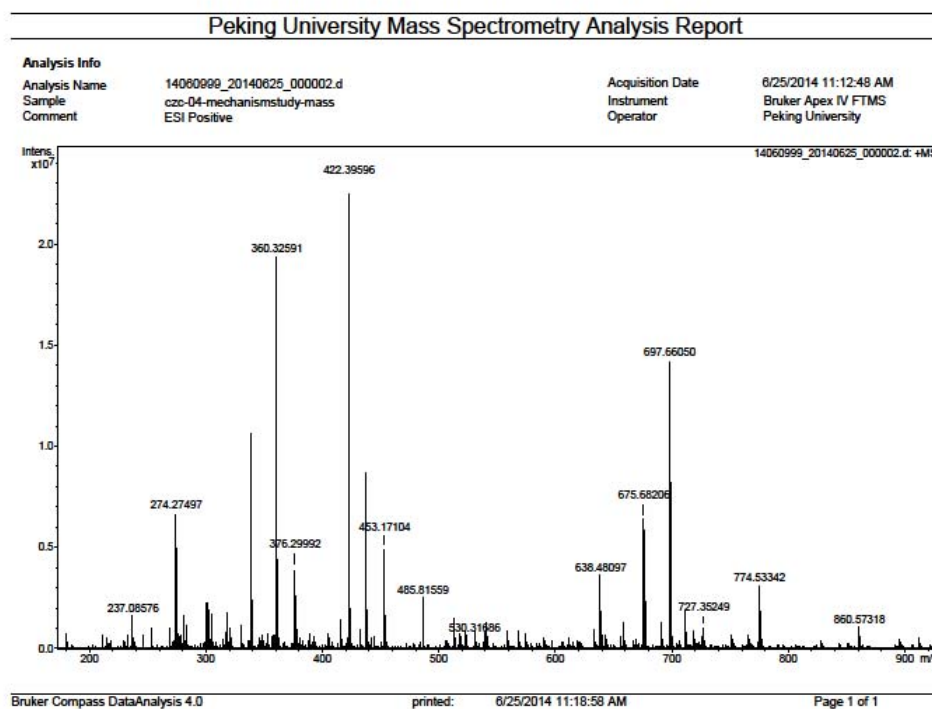

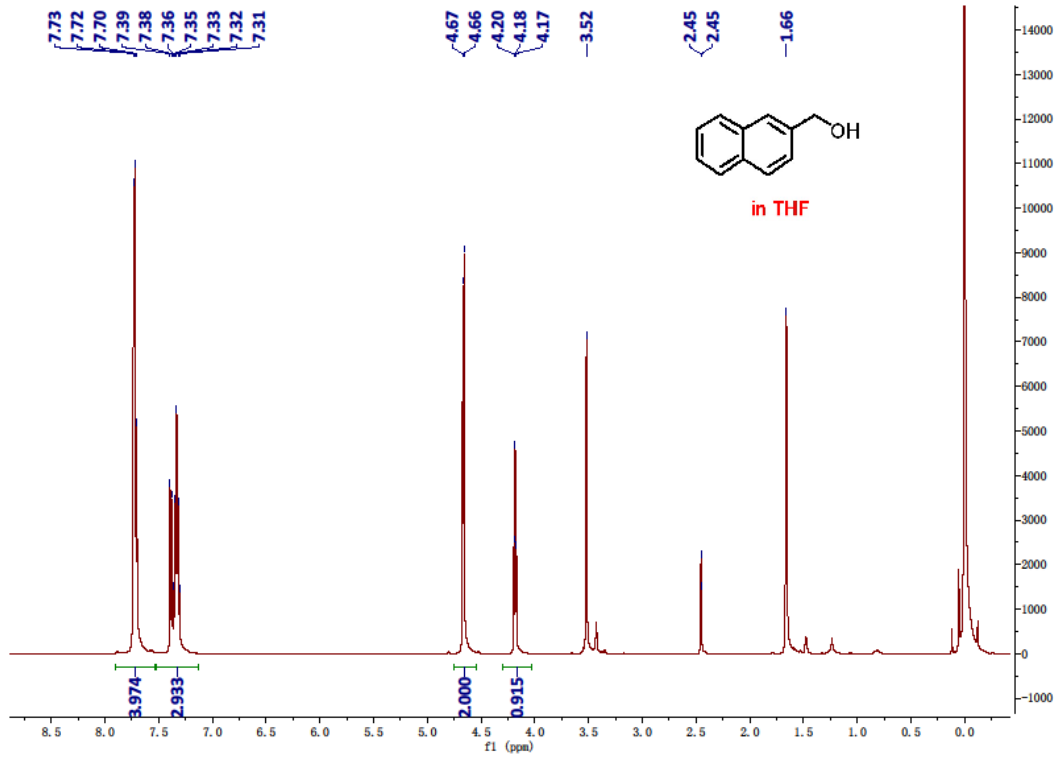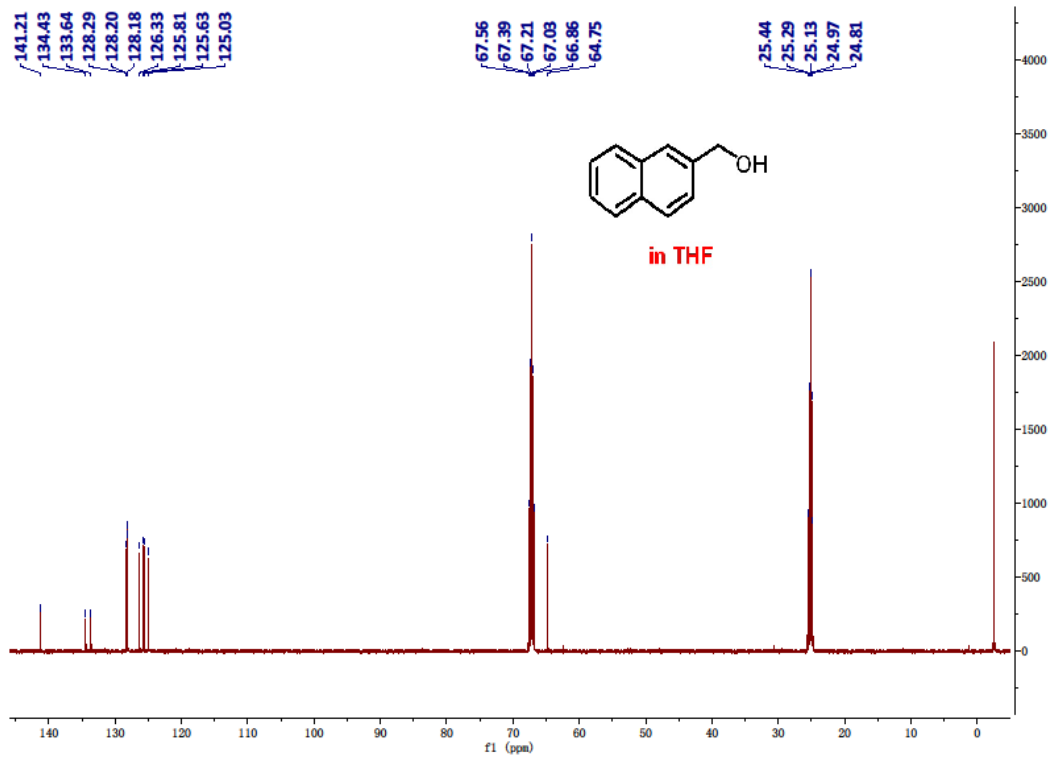

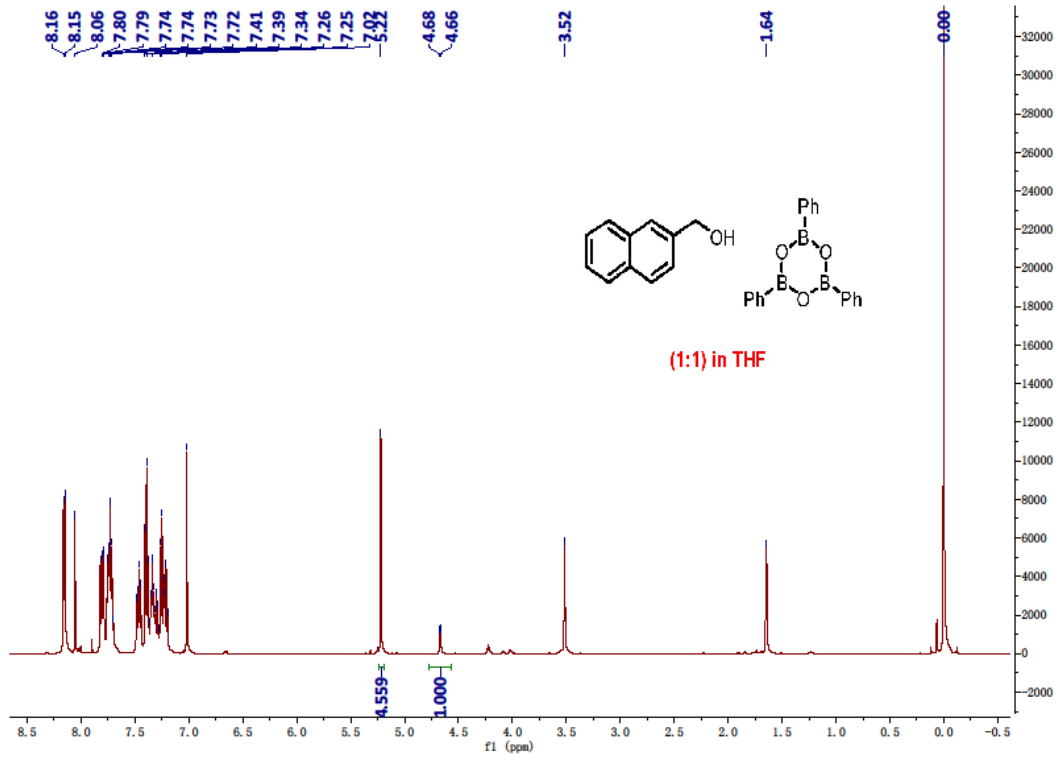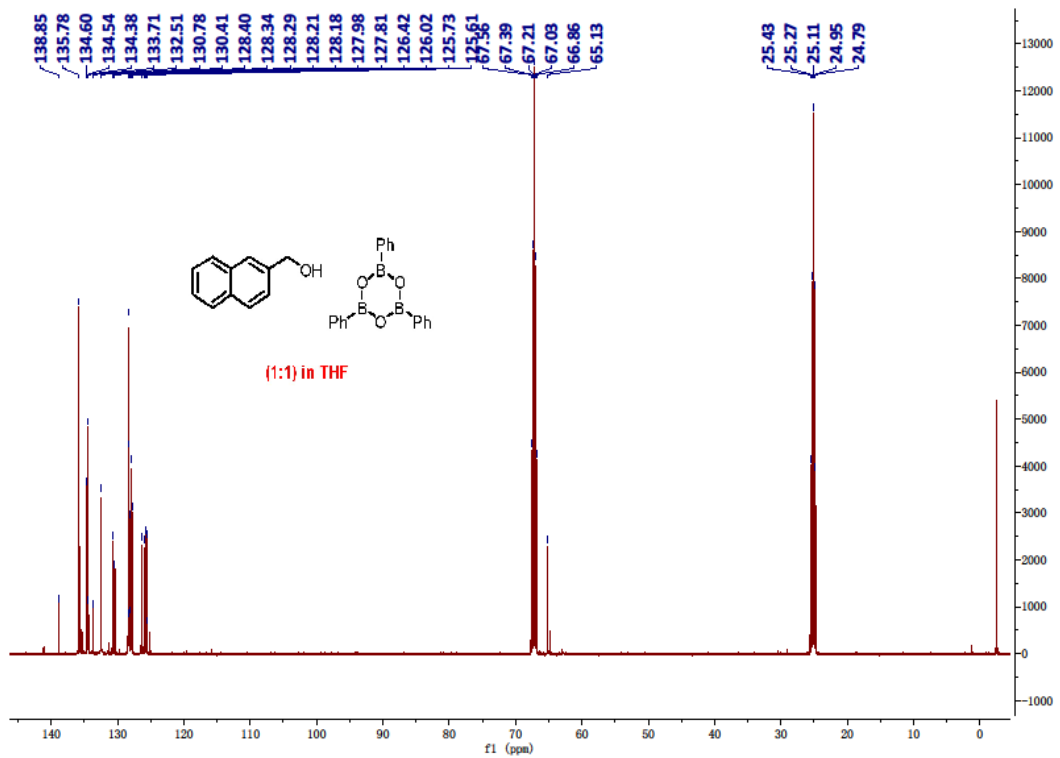

## Part 4. Synthesis and Analytical Data for Products

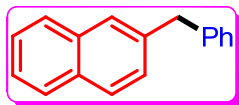

### 2-benzyl-naphthalene<sup>5</sup> (colorless oil)

<sup>1</sup>H NMR (CDCl<sub>3</sub>, 400 MHz): δ 7.78-7.71 (m, 3 H), 7.61 (s, 1 H), 7.43-7.39 (m, 2 H), 7.31-7.25 (m, 3 H), 7.22-7.18 (m, 3 H), 4.13 (s, 2 H);

<sup>13</sup>C NMR (CDCl<sub>3</sub>, 100 MHz): δ 140.97, 138.59, 133.60, 132.08, 129.02, 128.48, 128.06, 127.62, 127.61, 127.54, 127.08, 126.14, 125.96, 125.33, 42.10;

MS (EI) m/z: 218 (M<sup>+</sup>)

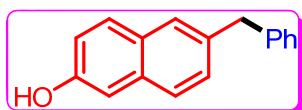

### 6-benzyl-2-naphthalenol (white oil)

<sup>1</sup>H NMR (400 MHz, CDCl<sub>3</sub>): δ 7.67 (d, *J* = 8.8 Hz, 1H), 7.59 (d, *J* = 8.5 Hz, 1H), 7.55 (s, 1H), 7.33 – 7.16 (m, 6H), 7.10 (d, *J* = 2.4 Hz, 1H), 7.06 (dd, *J* = 8.8, 2.5 Hz, 1H), 5.02 (s, 1H), 4.10 (s, 2H)

<sup>13</sup>C NMR (100 MHz, CDCl<sub>3</sub>): δ 153.06, 141.16, 136.32, 133.83, 133.16, 129.46, 129.08, 129.00, 128.48, 128.35, 127.01, 126.58, 126.11, 118.15, 117.80, 109.38, 41.92.

HRMS (ESI) Anal. Calcd. (M+H<sup>+</sup>) 235.11174, Found: 235.11173

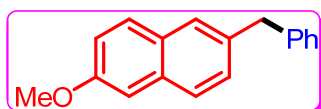

### 2-benzyl-6-methoxynaphthalene (white solid)

<sup>1</sup>H NMR (400 MHz, CDCl<sub>3</sub>): δ 7.66 (d, *J* = 2.7 Hz, 1H), 7.64 (d, *J* = 2.4 Hz, 1H), 7.55 (s, 1H), 7.32 – 7.16 (m, 7H), 7.11 (dd, *J* = 8.8, 2.6 Hz, 2H), 4.10 (s, 2H), 3.89 (s, 4H).

<sup>13</sup>C NMR (100 MHz, CDCl<sub>3</sub>): δ 157.36, 141.24, 136.30, 133.14, 129.11, 129.05, 129.01, 128.48, 128.15, 126.98, 126.97, 126.09, 118.74, 105.74, 55.31, 41.93

HRMS (ESI) Anal. Calcd. (M+H<sup>+</sup>) 249.12739, Found: 249.12709

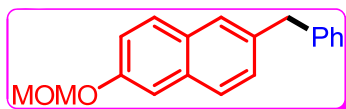

### 2-benzyl-6-(methoxymethoxy)naphthalene (colorless oil)

<sup>1</sup>H NMR (400 MHz, CDCl<sub>3</sub>): δ 7.67 (dd, *J* = 10.8, 8.8 Hz, 1H), 7.56 (s, 1H), 7.36 (d, *J* = 2.3 Hz, 1H), 7.32 – 7.15 (m, 4H), 5.27 (s, 1H), 4.10 (s, 2H), 3.51 (s, 2H).

<sup>13</sup>C NMR (100 MHz, CDCl<sub>3</sub>): δ 154.78, 141.18, 136.78, 133.03, 129.68, 129.06, 129.01, 128.48, 128.19, 127.27, 126.92, 126.11, 119.05, 110.01, 94.64, 56.04, 41.96.

HRMS (ESI) Anal. Calcd. (M+H<sup>+</sup>) 279.13796, Found: 279.13840

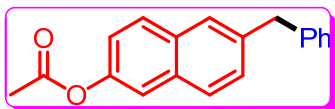

**6-benzyl-2-naphthyl acetate (white solid)**

$^1\text{H NMR}$  (400 MHz,  $\text{CDCl}_3$ ):  $\delta$  7.73 (dd,  $J = 23.4, 8.7$  Hz, 2H), 7.62 (s, 1H), 7.50 (d,  $J = 2.0$  Hz, 1H), 7.34 – 7.24 (m, 3H), 7.20 (dt,  $J = 11.1, 4.5$  Hz, 4H), 4.12 (s, 2H), 2.33 (s, 3H).

$^{13}\text{C NMR}$  (100 MHz,  $\text{CDCl}_3$ ):  $\delta$  157.36, 141.24, 136.30, 133.14, 129.11, 129.05, 129.01, 128.48, 128.15, 126.98, 126.97, 126.09, 118.74, 105.74, 55.31, 41.93.

HRMS (ESI) Anal. Calcd. ( $\text{M}+\text{H}^+$ ) 277.12231, Found: 277.12283

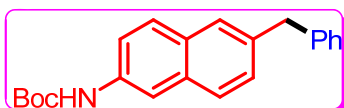

**tert-butyl 6-benzyl-2-naphthylcarbamate (flavescent solid)**

$^1\text{H NMR}$  (400 MHz,  $\text{CDCl}_3$ ):  $\delta$  7.93 (s, 1H), 7.67 (d,  $J = 8.5$  Hz, 2H), 7.53 (s, 1H), 7.37 – 7.14 (m, 7H), 6.60 (s, 1H), 4.10 (s, 2H), 1.54 (s, 9H)

$^{13}\text{C NMR}$  (100 MHz,  $\text{CDCl}_3$ ):  $\delta$  152.85, 141.06, 137.24, 135.42, 132.64, 130.20, 129.04, 128.49, 128.38, 128.25, 127.58, 126.76, 126.13, 119.30, 114.48, 80.65, 41.99, 28.40.

HRMS (ESI) Anal. Calcd. ( $\text{M}+\text{Na}^+$ ) 356.16210, Found: 356.16183

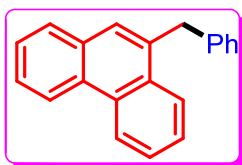

**9-benzylphenanthrene (white solid)**

$^1\text{H NMR}$  (400 MHz,  $\text{CDCl}_3$ ):  $\delta$  8.68 (dd,  $J = 23.8, 8.2$  Hz, 2H), 8.02 (d,  $J = 8.0$  Hz, 1H), 7.83 – 7.77 (m, 1H), 7.66 – 7.48 (m, 5H), 7.32 – 7.15 (m, 5H), 4.47 (s, 2H).

$^{13}\text{C NMR}$  (100 MHz,  $\text{CDCl}_3$ ):  $\delta$  140.31, 134.81, 131.86, 131.43, 130.87, 129.99, 128.84, 128.53, 128.30, 127.96, 126.68, 126.66, 126.28, 126.20, 125.07, 123.15, 122.51, 99.99, 39.64.

HRMS (ESI) Anal. Calcd. ( $\text{M}+\text{H}^+$ ) 269.13248, Found: 269.13191

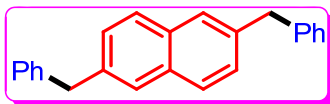

**2,6-dibenzyl-1-naphthalene (white solid)**

$^1\text{H NMR}$  (400 MHz,  $\text{CDCl}_3$ ):  $\delta$  7.67 (d,  $J = 8.3$  Hz, 2H), 7.58 (s, 2H), 7.33 – 7.14 (m, 12H), 4.11 (s, 4H).

$^{13}\text{C NMR}$  (100 MHz,  $\text{CDCl}_3$ ):  $\delta$  141.09, 138.14, 132.28, 129.03, 128.49, 127.82, 127.77, 126.91, 126.13, 42.09.

HRMS (ESI) Anal. Calcd. ( $\text{M}+\text{H}^+$ ) 309.16378, Found: 309.16420

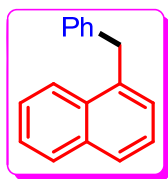

**1-benzyl-naphthalene (colorless oil)**

$^1\text{H NMR}$  (400 MHz,  $\text{CDCl}_3$ ):  $\delta$  8.05 – 7.94 (m, 1H), 7.92 – 7.80 (m, 1H), 7.76 (d,  $J = 8.2$  Hz, 1H), 7.52 – 7.35 (m, 3H), 7.34 – 7.11 (m, 6H), 4.45 (s, 2H).

$^{13}\text{C NMR}$  (100 MHz,  $\text{CDCl}_3$ ):  $\delta$  140.65, 136.64, 133.97, 132.17, 128.75, 128.67, 128.45, 127.34, 127.15, 126.06, 125.96, 125.55, 124.28, 39.05.

HRMS (ESI) Anal. Calcd. ( $\text{M}+\text{Na}^+$ ) 241.09877, Found: 241.09946

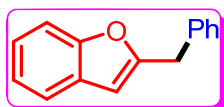

**2-benzylbenzofuran<sup>6</sup> (colorless oil)**

$^1\text{H NMR}$  (400 MHz,  $\text{CDCl}_3$ ):  $\delta$  7.49 – 7.43 (m, 1H), 7.43 – 7.37 (m, 1H), 7.35 – 7.13 (m, 7H), 6.36 (d,  $J = 0.9$  Hz, 1H), 4.09 (s, 2H).

$^{13}\text{C NMR}$  (100 MHz,  $\text{CDCl}_3$ ):  $\delta$  157.83, 155.02, 137.28, 128.94, 128.85, 128.64, 126.79, 123.44, 122.55, 120.44, 110.94, 103.39, 35.04.

MS (EI)  $m/z$ : 208 ( $\text{M}^+$ )

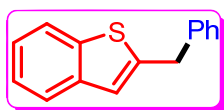

**2-benzylbenzo[b]thiophene<sup>7</sup> (colorless oil)**

$^1\text{H NMR}$  (400 MHz,  $\text{CDCl}_3$ ):  $\delta$  7.72 (d,  $J = 7.9$  Hz, 1H), 7.64 (d,  $J = 7.7$  Hz, 1H), 7.41 – 7.15 (m, 7H), 6.99 (s, 1H), 4.21 (s, 2H).

$^{13}\text{C NMR}$  (100 MHz,  $\text{CDCl}_3$ ):  $\delta$  145.17, 140.10, 139.88, 139.58, 128.81, 128.66, 126.76, 124.17, 123.67, 122.98, 122.19, 121.69, 37.02.

MS (EI)  $m/z$ : 224 ( $\text{M}^+$ )

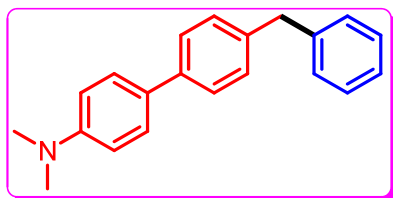

**4'-benzyl-*N,N*-dimethylbiphenyl-4-amine<sup>8</sup> (Yellowish solid)**

$^1\text{H NMR}$  (400 MHz,  $\text{CDCl}_3$ ):  $\delta$  7.52 – 7.43 (m, 4H), 7.33 – 7.16 (m, 7H), 6.79 (d,  $J = 8.8$  Hz, 2H), 4.00 (s, 2H), 2.97 (s, 6H).

$^{13}\text{C NMR}$  (100 MHz,  $\text{CDCl}_3$ ):  $\delta$  149.89, 141.28, 139.09, 138.88, 129.24, 129.14, 128.99, 128.50, 127.59, 126.37, 126.08, 112.82, 41.59, 40.62.

HRMS (ESI) Anal. Calcd. ( $\text{M}+\text{H}^+$ ) 288.17468, Found: 288.17407.



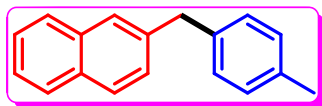

**2-(4-methylbenzyl)naphthalene (colorless oil)**

$^1\text{H NMR}$  (400 MHz,  $\text{CDCl}_3$ ):  $\delta$  7.83 – 7.71 (m, 3H), 7.62 (s, 1H), 7.49 – 7.37 (m, 2H), 7.30 (dd,  $J = 8.4$ , 1.6 Hz, 1H), 7.15 – 7.06 (m, 4H), 4.10 (s, 2H), 2.31 (s, 3H).

$^{13}\text{C NMR}$  (100 MHz,  $\text{CDCl}_3$ ):  $\delta$  138.91, 137.95, 135.65, 133.65, 132.09, 129.20, 128.92, 128.05, 127.65, 127.63, 127.56, 127.01, 125.94, 125.30, 41.71, 21.03.

HRMS (ESI) Anal. Calcd. ( $\text{M}+\text{H}^+$ ) 232.12465, Found: 232.12406

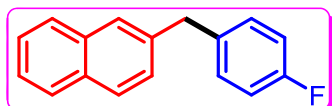

**2-(4-fluorobenzyl)naphthalene (white solid)**

$^1\text{H NMR}$  (400 MHz,  $\text{CDCl}_3$ ):  $\delta$  7.85 – 7.70 (m, 3H), 7.60 (s, 1H), 7.52 – 7.38 (m, 2H), 7.27 (dd,  $J = 8.4$ , 1.6 Hz, 1H), 7.21 – 7.12 (m, 2H), 4.10 (s, 2H).

$^{13}\text{C NMR}$  (100 MHz,  $\text{CDCl}_3$ ):  $\delta$  161.48, (d,  $J = 242.0$  Hz), 138.39, 136.61, (d,  $J = 3.0$  Hz), 133.59, 132.12, 130.37 (d,  $J = 8.0$  Hz), 128.17, 127.63, 127.53, 127.43, 127.02, 126.06, 125.44, 115.24 (d,  $J = 21.0$  Hz), 41.23.

HRMS (ESI) Anal. Calcd. ( $\text{M}+\text{Na}^+$ ) 255.11497, Found: 255.11432

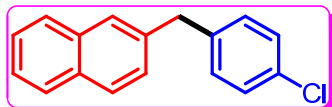

**2-(4-chlorobenzyl)naphthalene (colorless oil)**

$^1\text{H NMR}$  (400 MHz,  $\text{CDCl}_3$ ):  $\delta$  7.84 – 7.72 (m, 1H), 7.60 (s, 1H), 7.50 – 7.39 (m, 1H), 7.31 – 7.22 (m, 1H), 7.15 (d,  $J = 8.4$  Hz, 1H), 4.10 (s, 1H).

$^{13}\text{C NMR}$  (100 MHz,  $\text{CDCl}_3$ ):  $\delta$  139.45, 138.02, 133.61, 132.16, 132.01, 130.36, 128.62, 128.25, 127.66, 127.55, 127.42, 127.13, 126.12, 125.52, 41.42.

HRMS (EI)  $m/z$ : Anal. Calcd. 252.0706, Found: 252.0710 ( $\text{M}^+$ ).

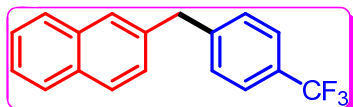

**2-(4-(trifluoromethyl)benzyl)naphthalene (colorless oil)**

$^1\text{H NMR}$  (400 MHz,  $\text{CDCl}_3$ ):  $\delta$  7.84 – 7.75 (m, 1H), 7.63 (s, 1H), 7.54 (d,  $J = 8.1$  Hz, 1H), 7.50 – 7.41 (m, 1H), 7.34 (d,  $J = 8.0$  Hz, 1H), 7.28 (dd,  $J = 8.4$ , 1.6 Hz, 1H), 4.19 (s, 1H).

$^{13}\text{C NMR}$  (100 MHz,  $\text{CDCl}_3$ ):  $\delta$  145.07, 137.41, 133.59, 132.20, 129.28, 128.58 (q,  $J = 32.0$  Hz), 128.36, 127.66, 127.55, 127.36, 127.28, 126.19, 125.84 (q,  $J = 271.0$  Hz), 125.62, 125.43 (q,  $J = 4.0$  Hz), 41.87.

HRMS (EI)  $m/z$ : Anal. Calcd. 286.0969, Found: 286.0973 ( $\text{M}^+$ ).

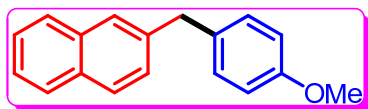

**2-(4-methoxybenzyl)naphthalene (white solid)**

$^1\text{H NMR}$  (400 MHz,  $\text{CDCl}_3$ ):  $\delta$  7.84 – 7.71 (m, 3H), 7.61 (s, 1H), 7.43 (p,  $J = 6.7$  Hz, 2H), 7.30 (d,  $J = 8.4$  Hz, 1H), 7.14 (d,  $J = 8.3$  Hz, 2H), 6.84 (d,  $J = 8.4$  Hz, 2H), 4.08 (s, 2H), 3.78 (s, 3H).

$^{13}\text{C NMR}$  (100 MHz,  $\text{CDCl}_3$ ):  $\delta$  158.05, 139.08, 133.63, 133.11, 132.08, 129.98, 128.05, 127.62, 127.60, 127.55, 126.92, 125.95, 125.30, 113.94, 55.28, 41.22.

HRMS (ESI) Anal. Calcd. ( $\text{M}+\text{Na}^+$ ) 271.10934, Found: 271.10888

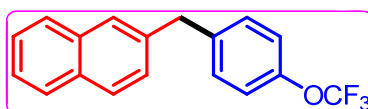

**2-(4-(trifluoromethoxy)benzyl)naphthalene (white solid)**

$^1\text{H NMR}$  (400 MHz,  $\text{CDCl}_3$ ):  $\delta$  7.85 – 7.73 (m, 3H), 7.62 (s, 1H), 7.49 – 7.39 (m, 2H), 7.28 (dd,  $J = 8.4$ , 1.6 Hz, 1H), 7.26 – 7.19 (m, 2H), 7.13 (d,  $J = 8.1$  Hz, 2H), 4.13 (s, 2H).

$^{13}\text{C NMR}$  (100 MHz,  $\text{CDCl}_3$ ):  $\delta$  147.66, 139.73, 137.87, 133.59, 132.17, 130.20, 128.28, 127.65, 127.54, 127.41, 127.17, 126.13, 125.54, 120.51 (q,  $J = 255.0$  Hz), 121.02, 41.36.

HRMS (EI)  $m/z$ : Anal. Calcd. 302.0918, Found: 302.0923 ( $\text{M}^+$ ).

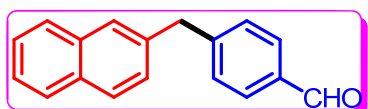

**4-(naphthalen-2-ylmethyl)benzaldehyde (colorless oil)**

$^1\text{H NMR}$  (400 MHz,  $\text{CDCl}_3$ ):  $\delta$  9.97 (s, 1H), 7.84 – 7.74 (m, 5H), 7.63 (s, 1H), 7.50 – 7.41 (m, 2H), 7.39 (d,  $J = 8.0$  Hz, 2H), 7.28 (dd,  $J = 8.4$ , 1.6 Hz, 1H), 4.21 (s, 2H).

$^{13}\text{C NMR}$  (100 MHz,  $\text{CDCl}_3$ ):  $\delta$  191.91, 148.27, 137.22, 134.80, 133.62, 132.24, 130.07, 129.67, 128.41, 127.68, 127.56, 127.37, 126.23, 125.67, 42.26.

HRMS (ESI) Anal. Calcd. ( $\text{M}+\text{H}^+$ ) 247.11174, Found: 247.11226

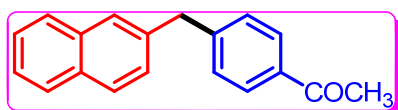

**1-(4-(naphthalen-2-ylmethyl)phenyl)ethanone (colorless oil)**

$^1\text{H NMR}$  (400 MHz,  $\text{CDCl}_3$ ):  $\delta$  7.84 – 7.73 (m, 3H), 7.61 (s, 1H), 7.49 – 7.39 (m, 2H), 7.29 (dd,  $J = 8.4$ , 1.6 Hz, 1H), 7.06 – 6.96 (m, 2H), 6.95 – 6.87 (m, 1H), 4.06 (s, 2H), 2.22 (d,  $J = 1.7$  Hz, 3H).

$^{13}\text{C NMR}$  (100 MHz,  $\text{CDCl}_3$ ):  $\delta$  197.79, 146.65, 137.51, 135.38, 133.61, 132.20, 129.22, 128.68, 128.33, 127.67, 127.56, 127.41, 127.28, 126.17, 125.60, 42.07, 26.56.

HRMS (ESI) Anal. Calcd. ( $\text{M}+\text{H}^+$ ) 261.12739, Found: 261.12731

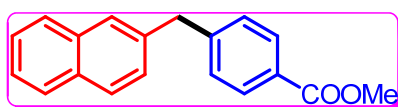

**methyl 4-(naphthalen-2-ylmethyl)benzoate (white solid)**

$^1\text{H NMR}$  (400 MHz,  $\text{CDCl}_3$ ):  $\delta$  8.00 – 7.93 (m, 2H), 7.83 – 7.73 (m, 3H), 7.61 (s, 1H), 7.49 – 7.39 (m, 2H), 7.32 – 7.23 (m, 3H), 4.18 (s, 2H), 3.89 (s, 3H).

$^{13}\text{C NMR}$  (100 MHz,  $\text{CDCl}_3$ ):  $\delta$  167.06, 146.37, 137.61, 133.62, 132.20, 129.87, 129.06, 128.30, 128.24, 127.67, 127.57, 127.45, 127.28, 126.15, 125.57, 52.00, 42.09.

HRMS (ESI) Anal. Calcd. ( $\text{M}+\text{H}^+$ ) 277.12231, Found: 277.12254

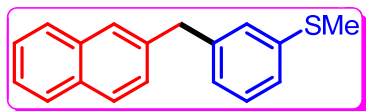

**methyl(3-(naphthalen-2-ylmethyl)phenyl)sulfane (colorless oil)**

$^1\text{H NMR}$  (400 MHz,  $\text{CDCl}_3$ ):  $\delta$  7.82 – 7.72 (m, 3H), 7.62 (s, 1H), 7.48 – 7.38 (m, 2H), 7.30 (dd,  $J = 8.4$ , 1.6 Hz, 1H), 7.21 (dd,  $J = 14.1$ , 6.4 Hz, 1H), 7.16 – 7.07 (m, 2H), 6.99 (d,  $J = 7.5$  Hz, 1H), 4.10 (s, 2H), 2.44 (s, 3H).

$^{13}\text{C NMR}$  (100 MHz,  $\text{CDCl}_3$ ):  $\delta$  141.67, 138.59, 138.20, 133.63, 132.15, 128.97, 128.15, 127.65, 127.59, 127.57, 127.29, 127.16, 126.04, 125.93, 125.43, 124.36, 42.02, 15.84.

HRMS (ESI) Anal. Calcd. ( $\text{M}+\text{H}^+$ ) 265.10455, Found: 265.10458

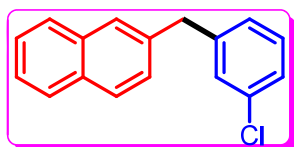

**2-(3-chlorobenzyl)naphthalene (colorless oil)**

$^1\text{H NMR}$  (400 MHz,  $\text{CDCl}_3$ ):  $\delta$  7.82 – 7.73 (m, 3H), 7.61 (s, 1H), 7.49 – 7.39 (m, 2H), 7.27 (dd,  $J = 8.4$ , 1.7 Hz, 1H), 7.24 – 7.15 (m, 3H), 7.13 – 7.06 (m, 1H), 4.09 (s, 2H).

$^{13}\text{C NMR}$  (100 MHz,  $\text{CDCl}_3$ ):  $\delta$  143.06, 137.69, 134.35, 133.63, 132.22, 129.75, 129.13, 128.32, 127.69, 127.61, 127.46, 127.26, 127.22, 126.43, 126.15, 125.58, 41.76.

HRMS (ESI) Anal. Calcd. ( $\text{M}+\text{H}^+$ ) 253.07785, Found: 253.07751

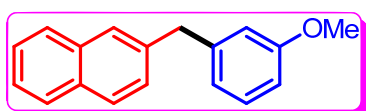

**2-(3-methoxybenzyl)naphthalene (colorless oil)**

$^1\text{H NMR}$  (400 MHz,  $\text{CDCl}_3$ ):  $\delta$  7.76 (dd,  $J = 14.9$ , 8.6 Hz, 3H), 7.63 (s, 1H), 7.48 – 7.37 (m, 2H), 7.31 (d,  $J = 8.4$  Hz, 1H), 7.21 (dd,  $J = 12.8$ , 4.9 Hz, 1H), 6.82 (d,  $J = 7.5$  Hz, 1H), 6.75 (d,  $J = 10.9$  Hz, 2H), 4.10 (s, 2H), 3.75 (s, 3H).

$^{13}\text{C NMR}$  (100 MHz,  $\text{CDCl}_3$ ):  $\delta$  159.81, 142.59, 138.44, 133.65, 132.15, 129.46, 128.09, 127.64, 127.62, 127.59, 127.12, 125.98, 125.37, 121.51, 114.92, 111.46, 55.17, 42.16.

HRMS (ESI) Anal. Calcd. ( $\text{M}+\text{Na}^+$ ) 249.12739, Found: 249.12736

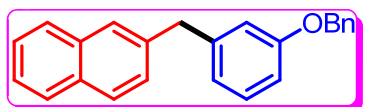

**2-(3-(benzyloxy)benzyl)naphthalene (colorless oil)**

$^1\text{H NMR}$  (400 MHz,  $\text{CDCl}_3$ ):  $\delta$  7.83 – 7.69 (m, 3H), 7.61 (s, 1H), 7.47 – 7.14 (m, 9H), 6.89 – 6.78 (m,

3H), 4.99 (s, 2H), 4.09 (s, 2H).

$^{13}\text{C}$  NMR (100 MHz,  $\text{CDCl}_3$ ):  $\delta$  159.06, 142.68, 138.40, 137.08, 133.68, 132.18, 129.51, 128.57, 128.13, 127.93, 127.66, 127.63, 127.56, 127.18, 126.01, 125.40, 121.77, 115.86, 112.44, 69.97, 42.17.  
HRMS (ESI) Anal. Calcd. ( $\text{M}+\text{H}^+$ ) 325.15869, Found: 325.15794

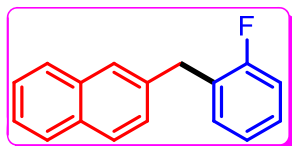

**2-(2-fluorobenzyl)naphthalene (colorless oil)**

$^1\text{H}$  NMR (400 MHz,  $\text{CDCl}_3$ ):  $\delta$  7.77 (dd,  $J = 12.4, 7.8$  Hz, 3H), 7.64 (s, 1H), 7.48 – 7.37 (m, 2H), 7.34 (dd,  $J = 8.4, 1.3$  Hz, 1H), 7.25 – 7.12 (m, 2H), 7.09 – 6.99 (m, 2H), 4.15 (s, 2H).

$^{13}\text{C}$  NMR (100 MHz,  $\text{CDCl}_3$ ):  $\delta$  161.00 (d,  $J = 244.0$  Hz), 159.78, 137.33, 133.60, 132.14, 131.10 (d,  $J = 5.0$  Hz), 128.12, 128.00 (d,  $J = 8.0$  Hz), 127.85, 127.58 (d,  $J = 5.0$  Hz), 127.39, 127.04, 125.99, 125.40, 124.08 (d,  $J = 4.0$  Hz), 115.33 (d,  $J = 21.0$  Hz), 34.91 (d,  $J = 3.0$  Hz).

HRMS (ESI) Anal. Calcd. ( $\text{M}+\text{H}^+$ ) 237.10741, Found: 237.10769

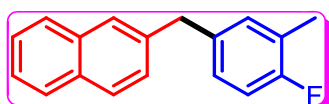

**2-(4-fluoro-3-methylbenzyl)naphthalene (colorless oil)**

$^1\text{H}$  NMR (400 MHz,  $\text{CDCl}_3$ ):  $\delta$  7.84 – 7.71 (m, 3H), 7.60 (s, 1H), 7.49 – 7.38 (m, 2H), 7.28 (dt,  $J = 9.3, 4.7$  Hz, 1H), 7.06 – 6.95 (m, 2H), 6.95 – 6.87 (m, 1H), 4.06 (s, 2H), 2.22 (d,  $J = 1.7$  Hz, 3H).

$^{13}\text{C}$  NMR (100 MHz,  $\text{CDCl}_3$ ):  $\delta$  160.01 (d,  $J = 242.0$  Hz), 138.60, 136.30 (d,  $J = 4.0$  Hz), 133.60, 132.10, 131.92 (d,  $J = 5.0$  Hz), 128.13, 127.62 (d,  $J = 8.0$  Hz), 127.63, 127.53, 127.48, 126.98, 126.02, 125.39, 124.69 (d,  $J = 18.0$  Hz), 114.83 (d,  $J = 22.0$  Hz), 41.28, 14.51 (d,  $J = 3.0$  Hz).

HRMS (ESI) Anal. Calcd. ( $\text{M}+\text{H}^+$ ) 273.10500, Found: 273.10542

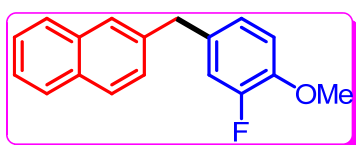

**2-(3-fluoro-4-methoxybenzyl)naphthalene (colorless oil)**

$^1\text{H}$  NMR (400 MHz,  $\text{CDCl}_3$ ):  $\delta$  7.84 – 7.72 (m, 3H), 7.60 (s, 1H), 7.49 – 7.38 (m, 2H), 7.28 (dd,  $J = 8.4, 1.6$  Hz, 1H), 6.98 – 6.83 (m, 3H), 4.05 (s, 2H), 3.85 (s, 3H).

$^{13}\text{C}$  NMR (100 MHz,  $\text{CDCl}_3$ ):  $\delta$  152.40 (d,  $J = 244.0$  Hz), 146.98 (d,  $J = 10.0$  Hz), 138.21, 134.14 (d,  $J = 6.0$  Hz), 133.59, 132.13, 128.18, 127.62, 127.53, 127.39, 127.01, 126.05, 125.44, 124.42 (d,  $J = 4.0$  Hz), 116.70 (d,  $J = 18.0$  Hz), 113.53 (d,  $J = 2.0$  Hz), 56.36, 41.10 (d,  $J = 1.0$  Hz).

HRMS (ESI) Anal. Calcd. ( $\text{M}+\text{Na}^+$ ) 289.09991, Found: 289.09945.

## Reference:

- [1] Tao, B.; Boykin, D. W. *J. Org. Chem.* **2004**, *69*, 4330.
- [2] Bollini, M.; Casal, J. J.; Bruno, A. M. *Bioorg. Med. Chem.* **2008**, *16*, 8003.
- [3] Kenji, K.; Michihiro, S.; Takeshi, Y.; Kieko, H. *PCT Int. Appl.*, 2011013524
- [4] So, C. M.; Kume, S.; Hayashi, T. *J. Am. Chem. Soc.* **2013**, *135*, 10990.
- [5] Srimani, D.; Bej, A.; Sarkar, A. *J. Org. Chem.* **2010**, *75*, 4296.
- [6] (a) Heppekausen, J.; Fürstner, A. *Angew. Chem., Int. Ed.* **2011**, *50*, 7829. (b) Xiao, Q.; Ma, J.; Yang, Y.; Zhang, Y.; Wang, J. *Org. Lett.* **2009**, *11*, 4732. (c) Das, J.; Ghosh, S.; *Tetra. Lett.* **2011**, *52*, 1112.
- [7] Lapointe, D.; Fagnou, K. *Org. Lett.* **2009**, *11*, 4160.
- [8] Yu, D. G.; Wang, X.; Zhu, R. Y.; Luo, S.; Zhang, X. B.; Wang, B. Q.; Wang L.; Shi, Z. J. *J. Am. Chem. Soc.* **2012**, *134*, 14638.

## II. Spectral Data for Compounds

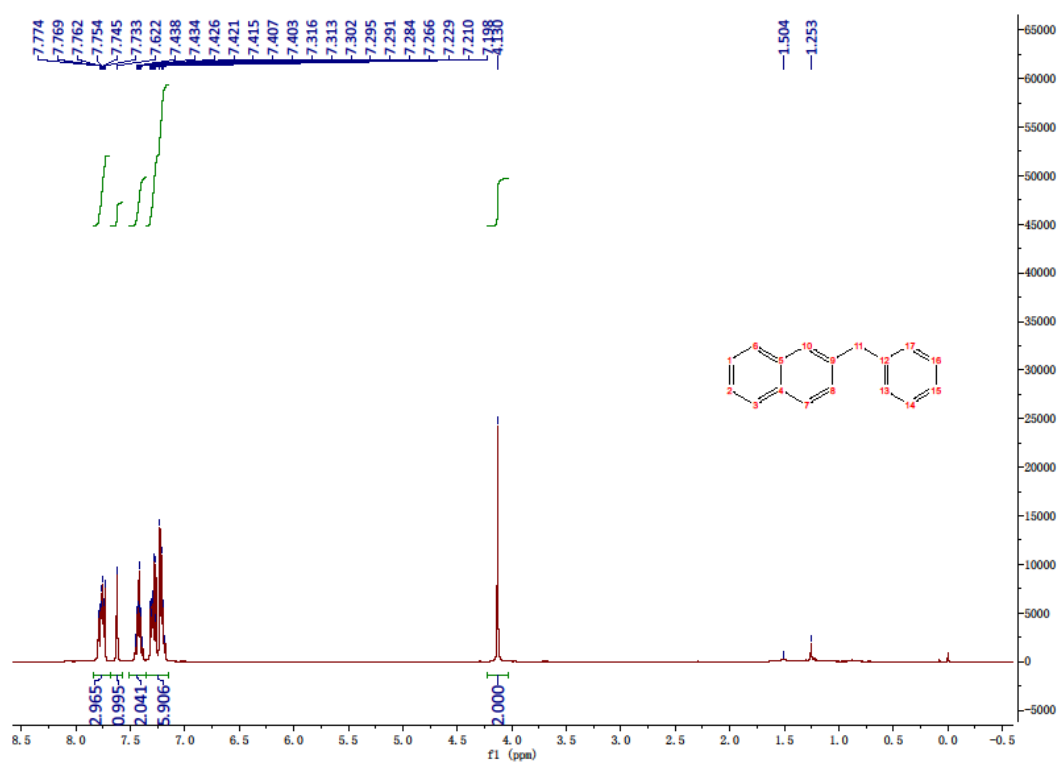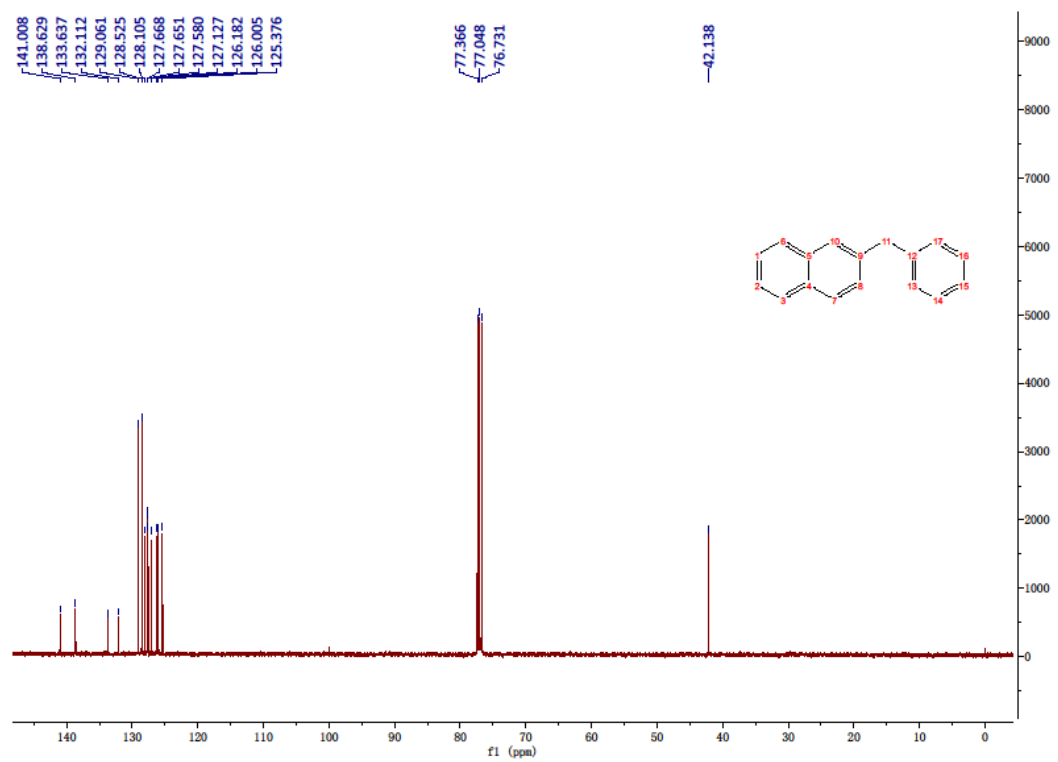

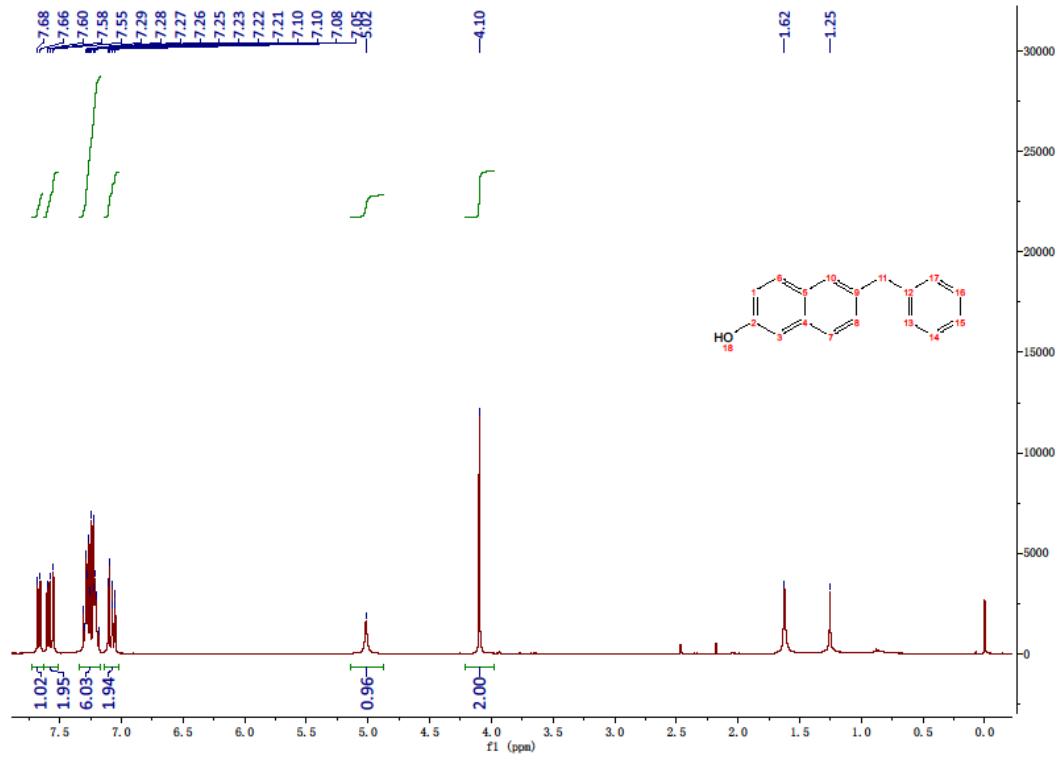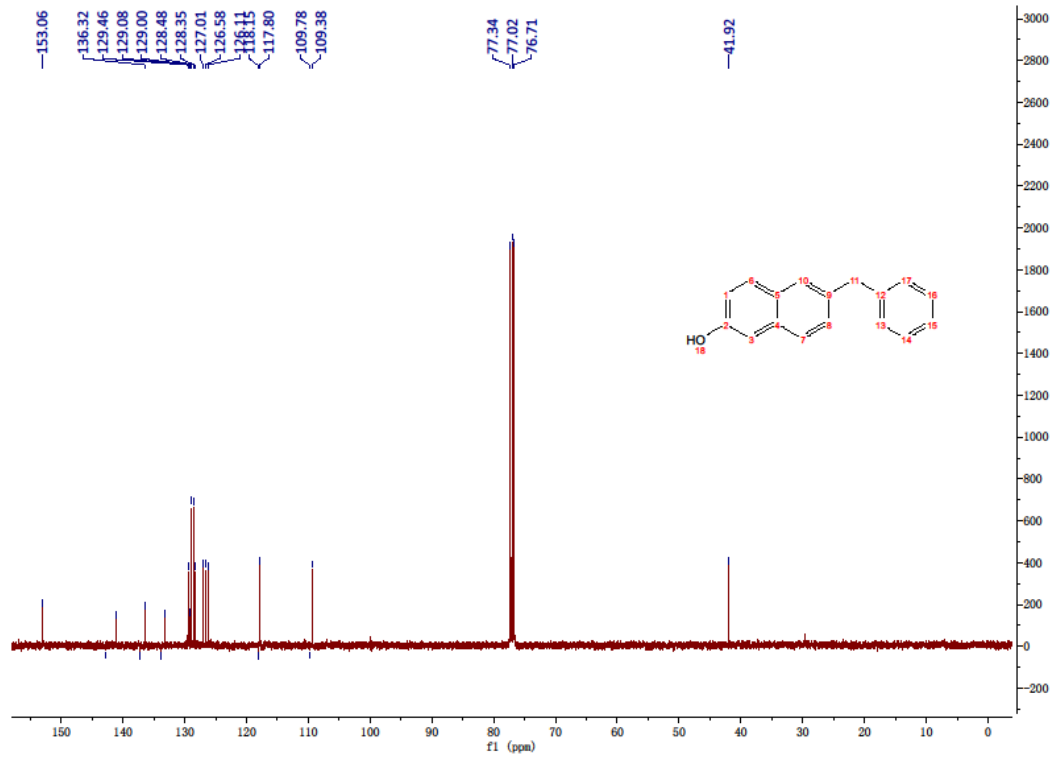

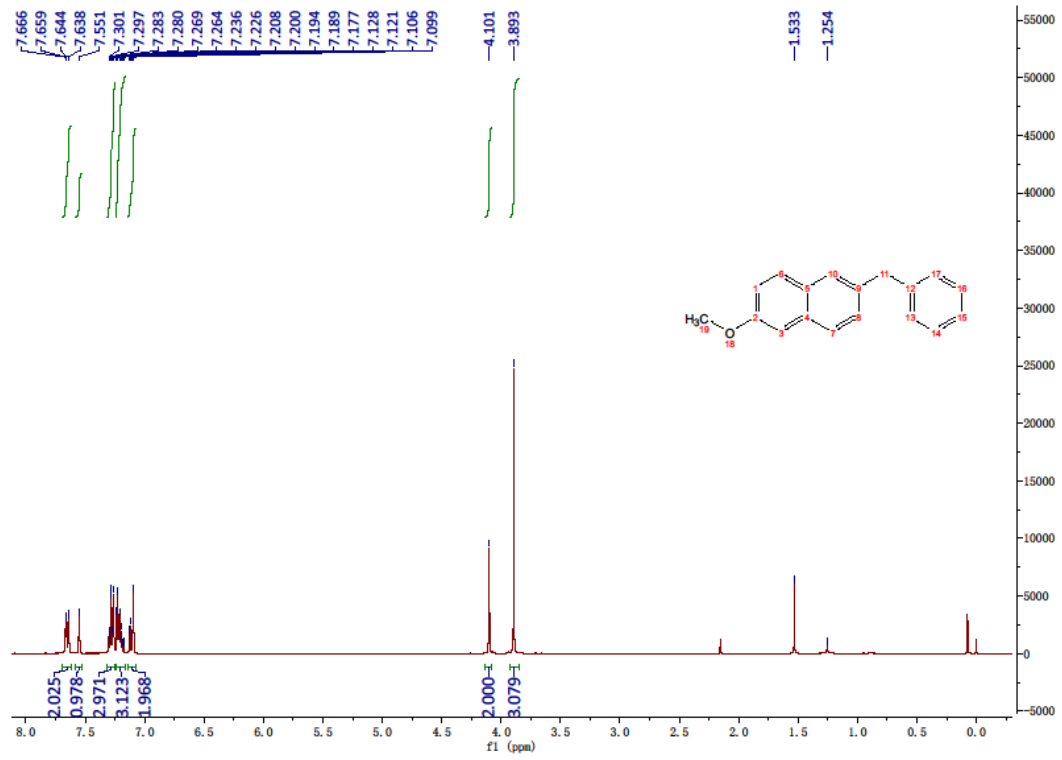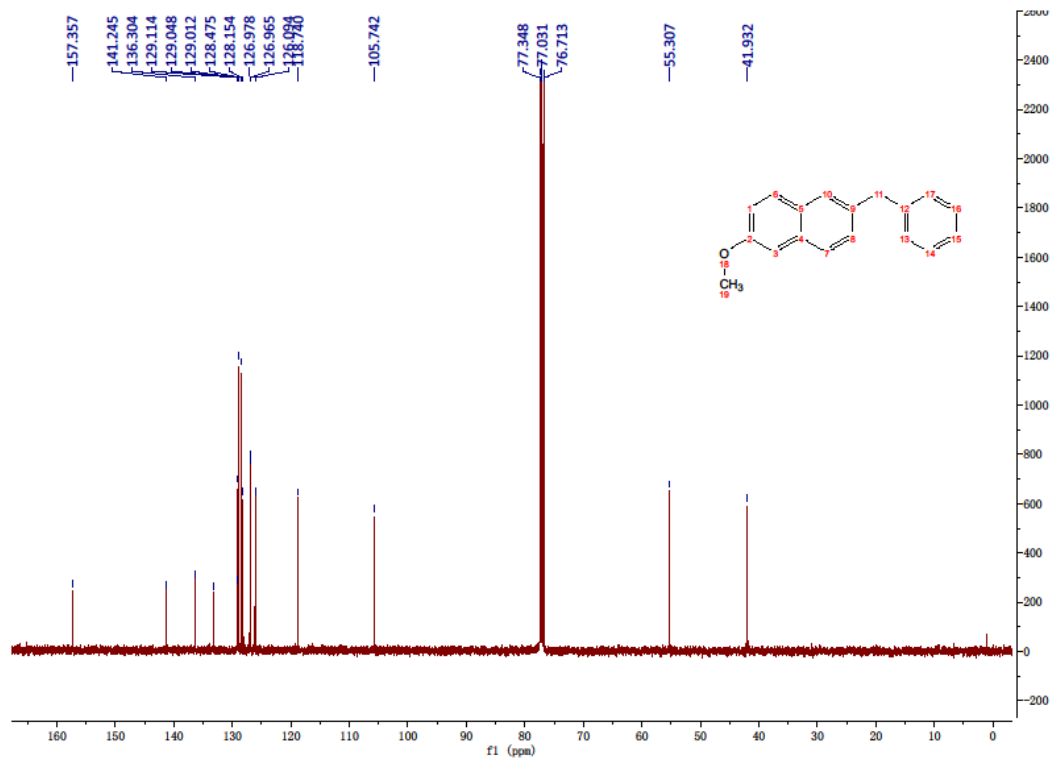



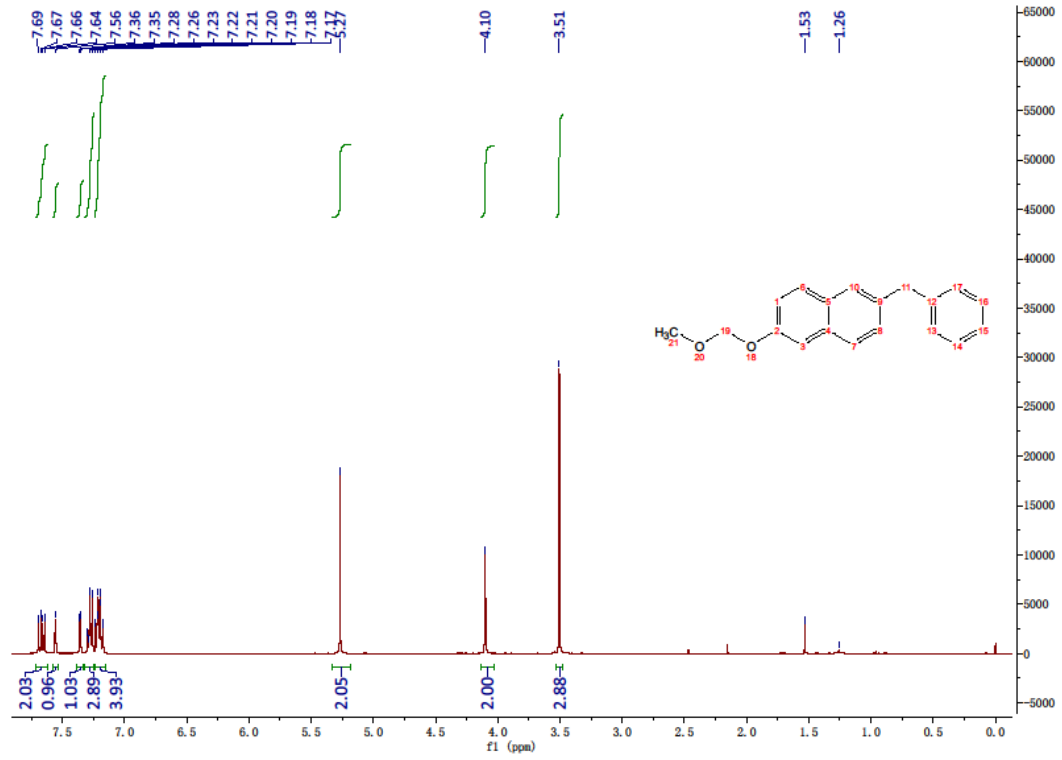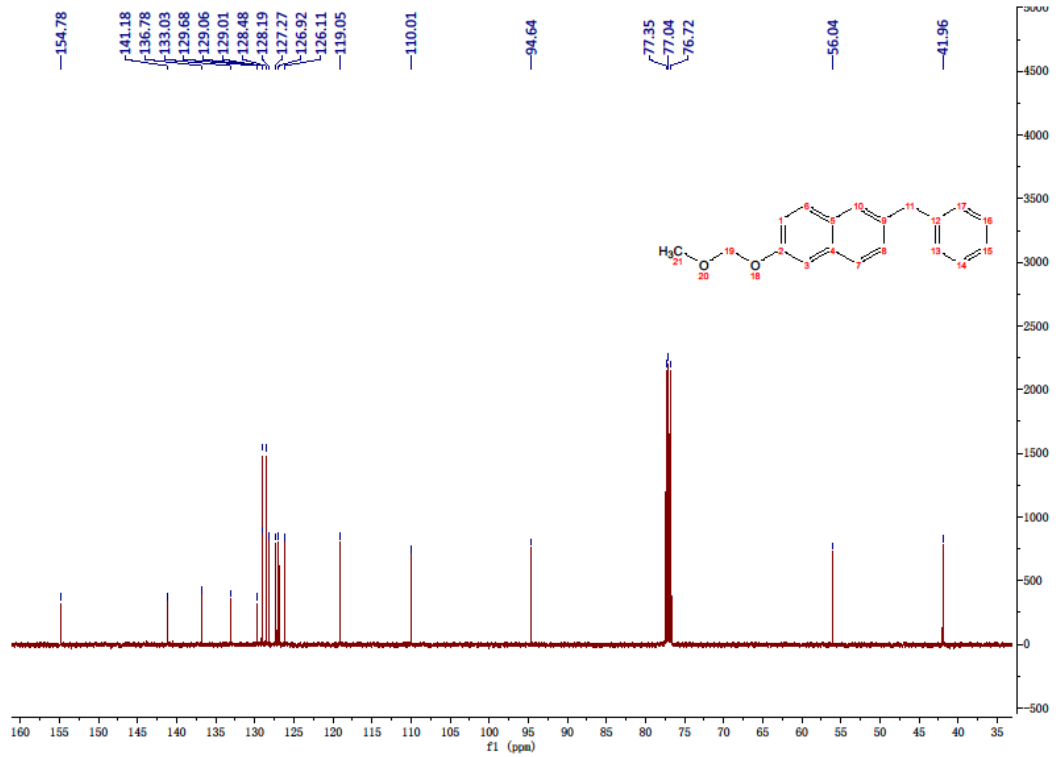

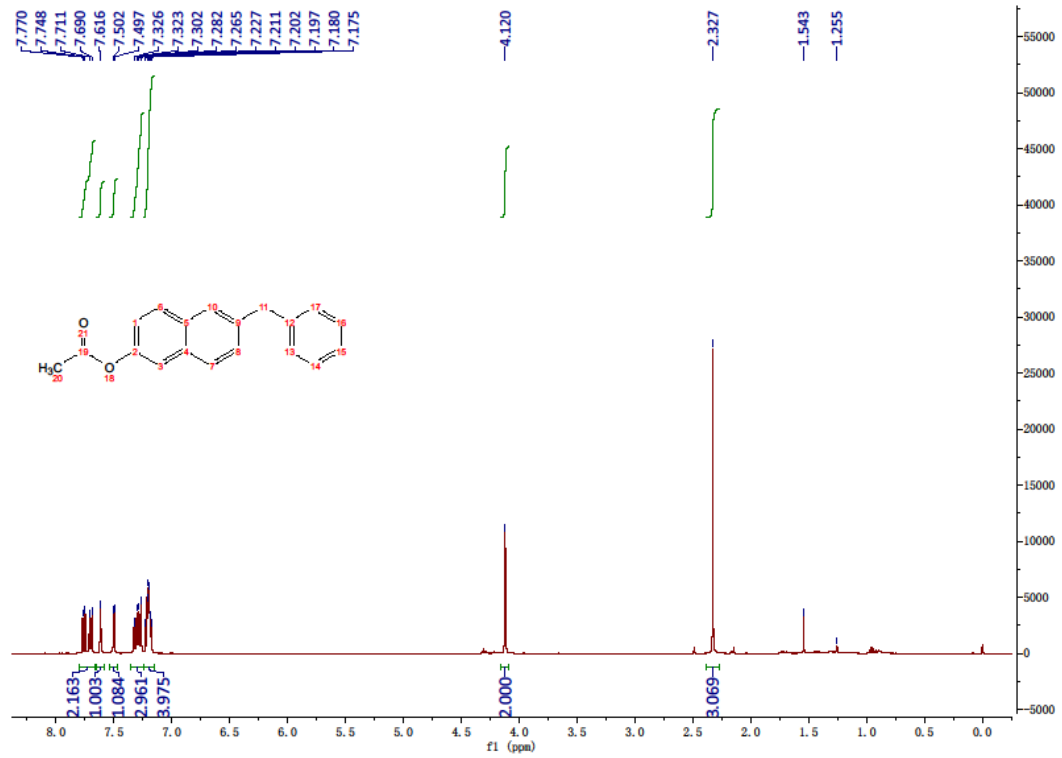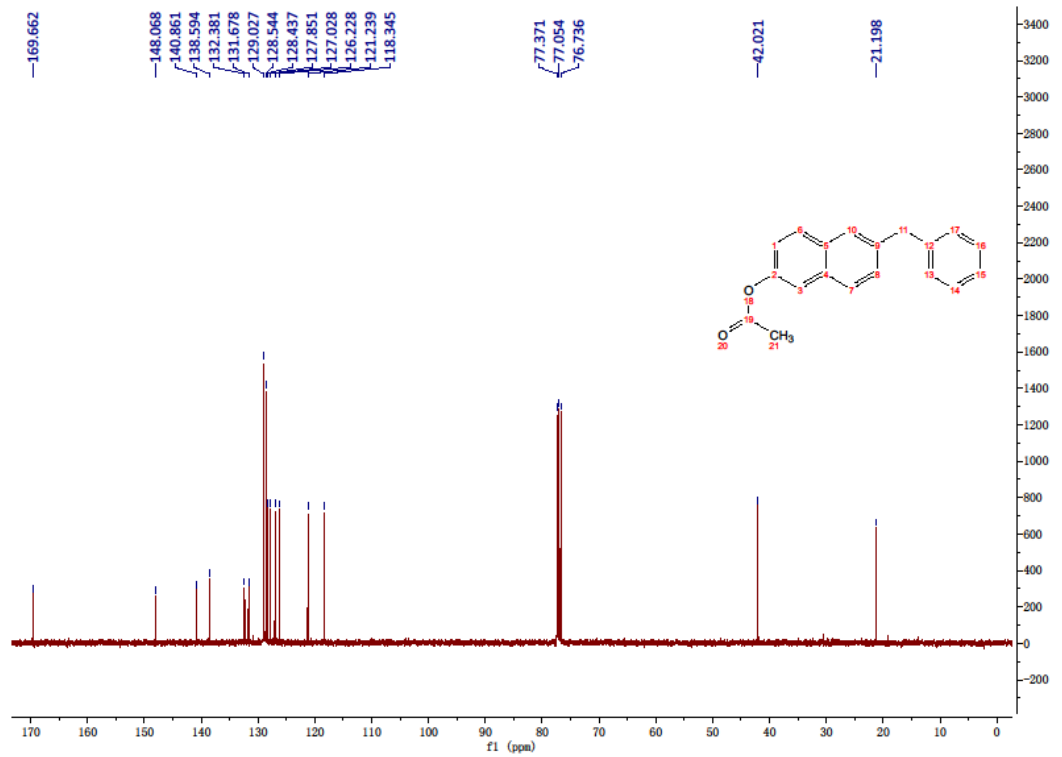

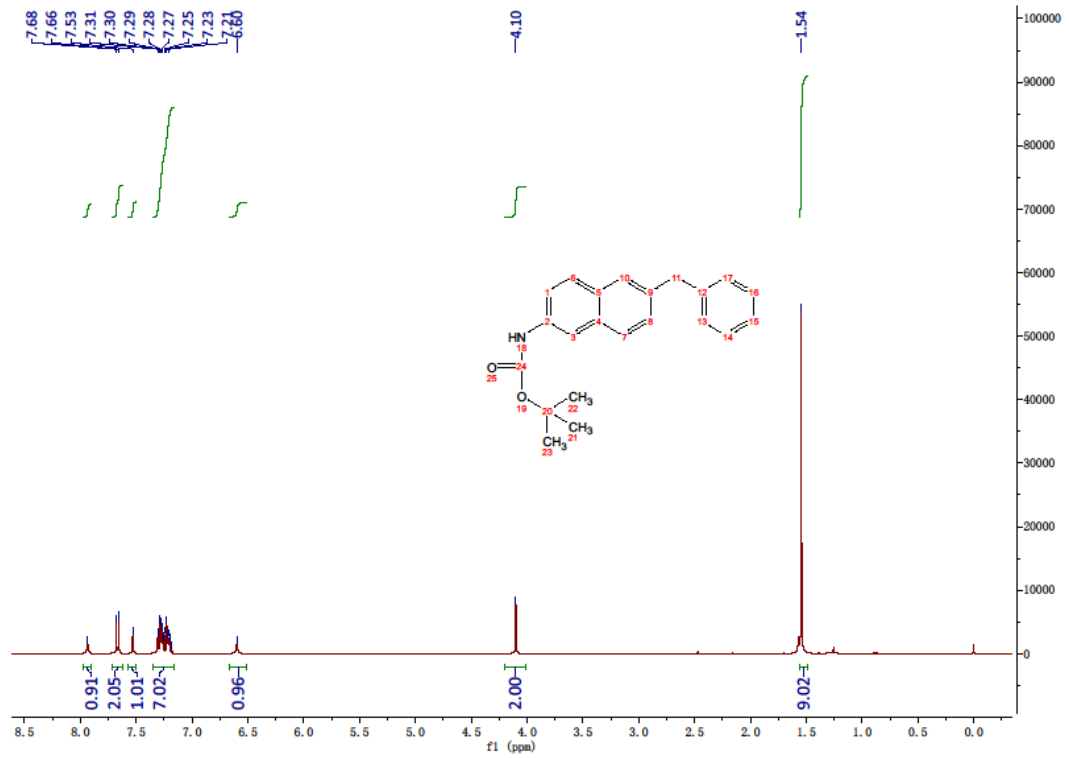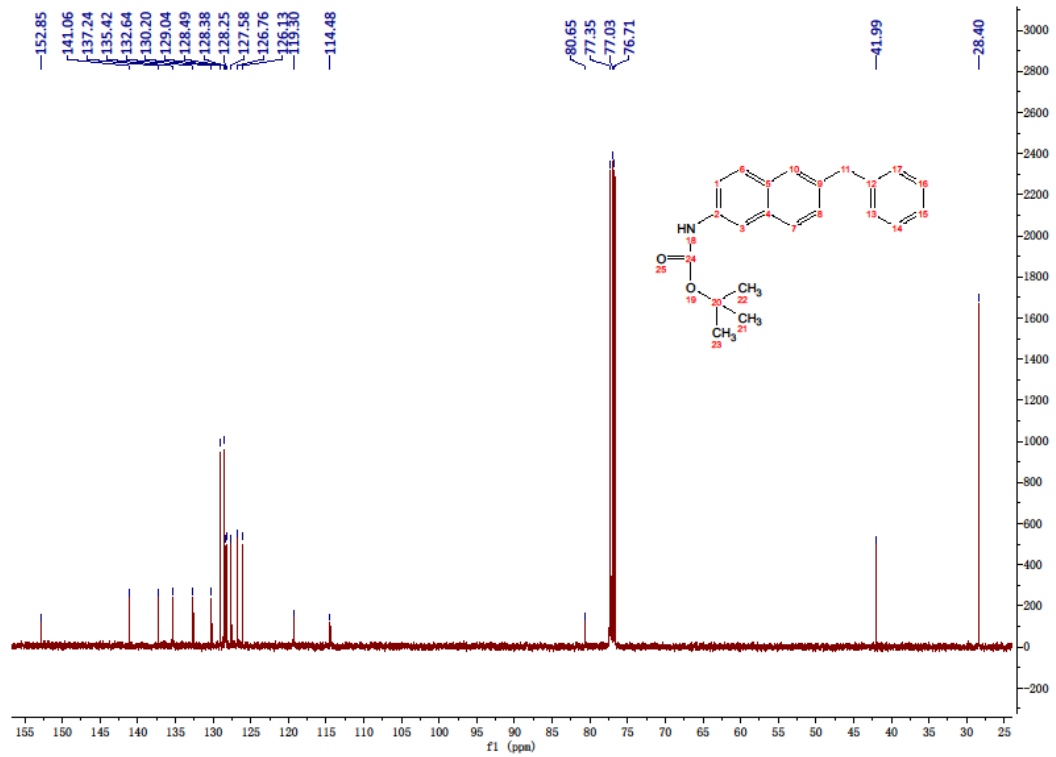

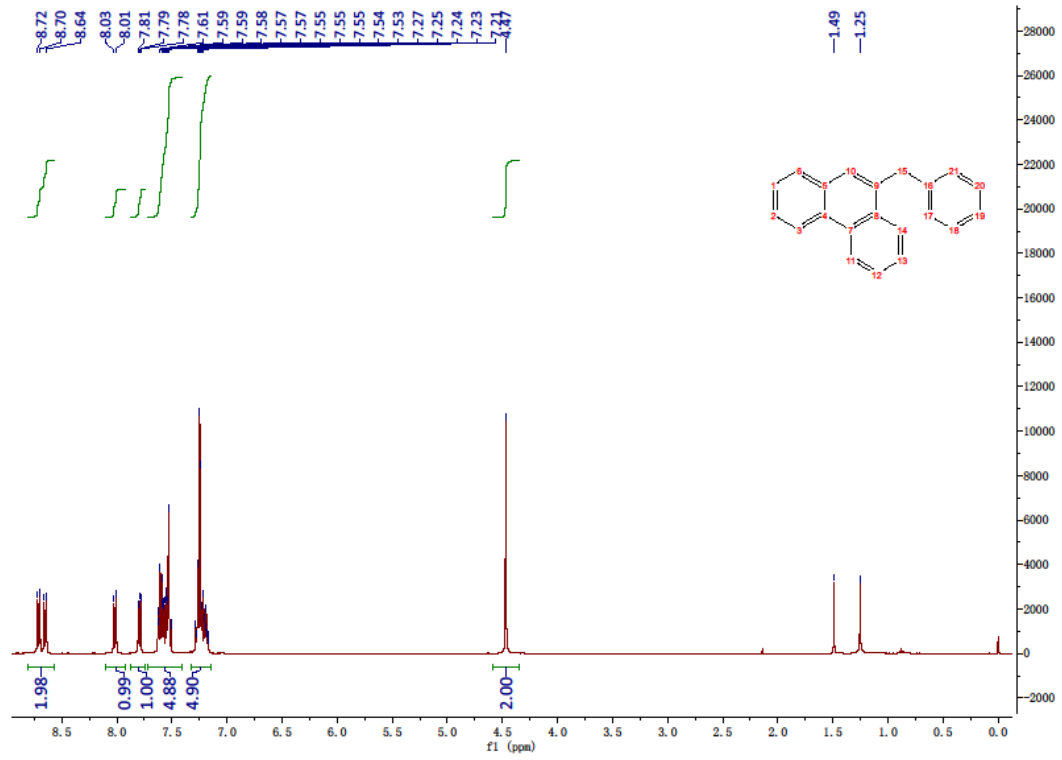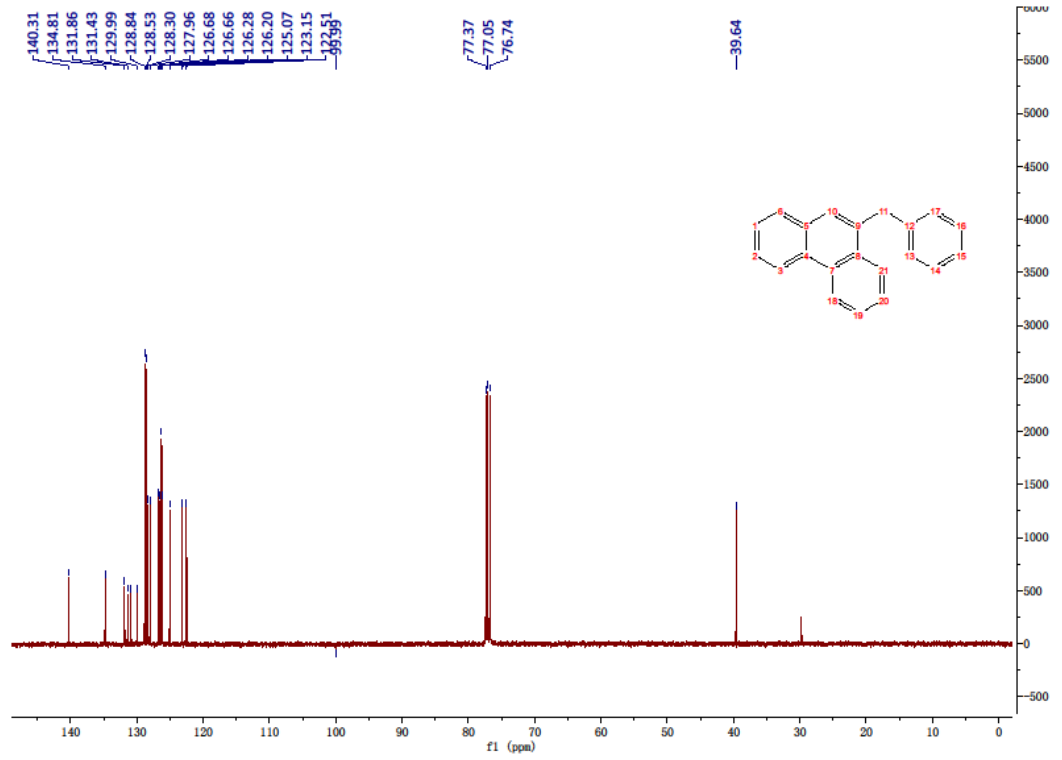

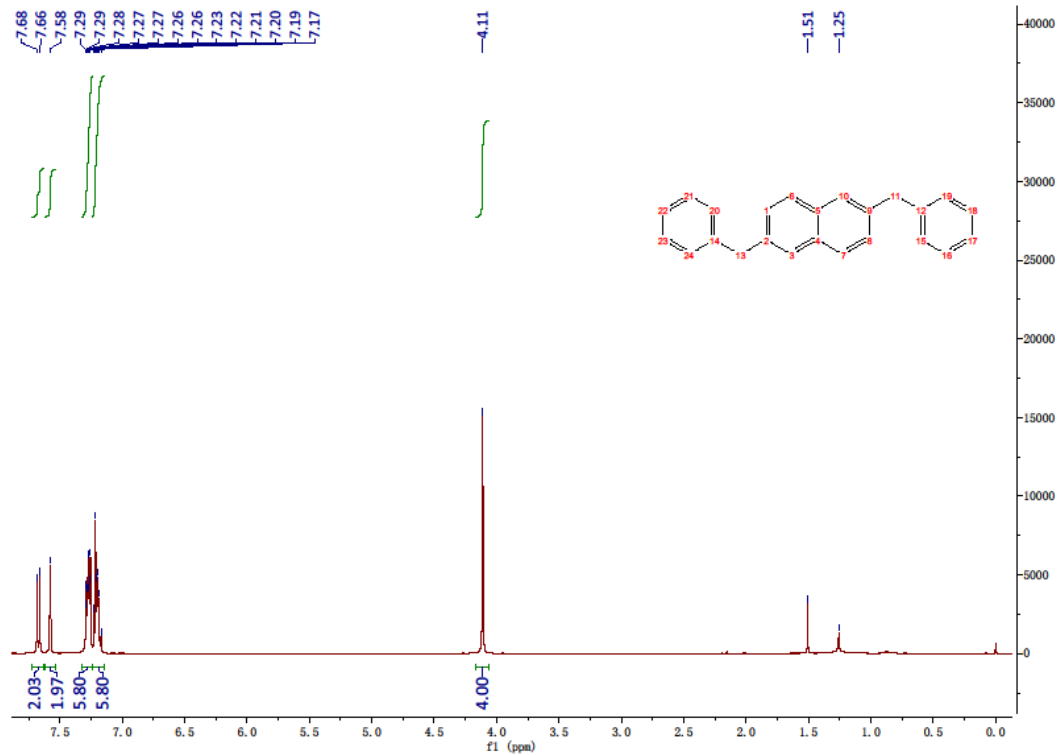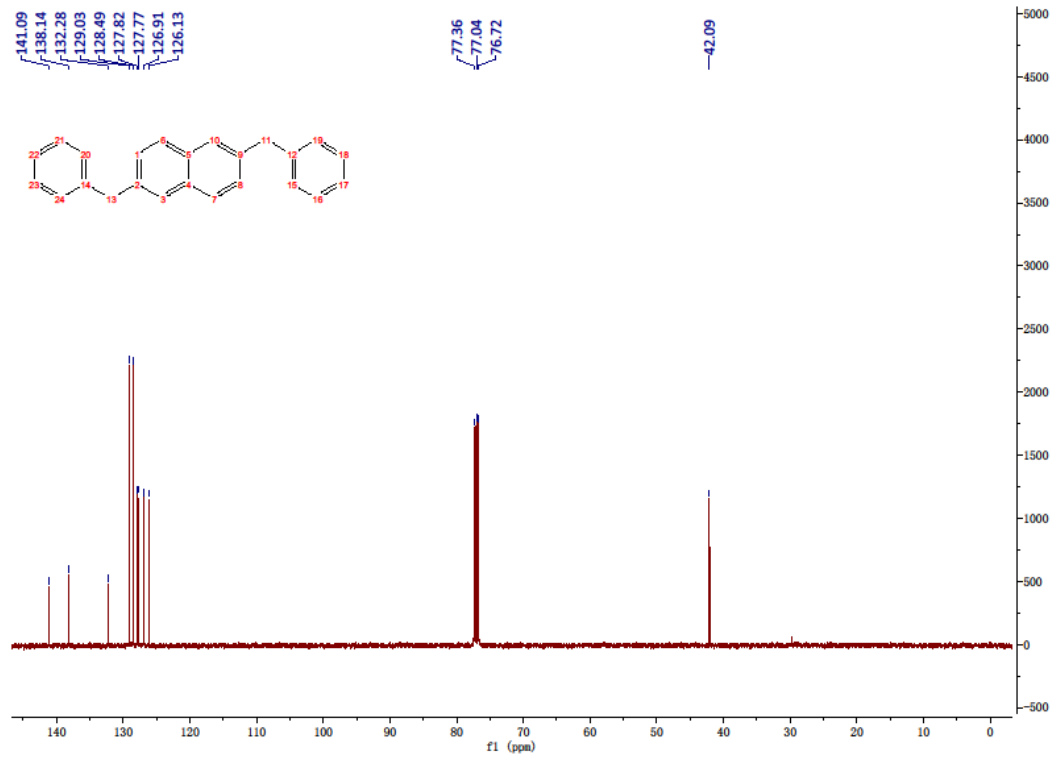

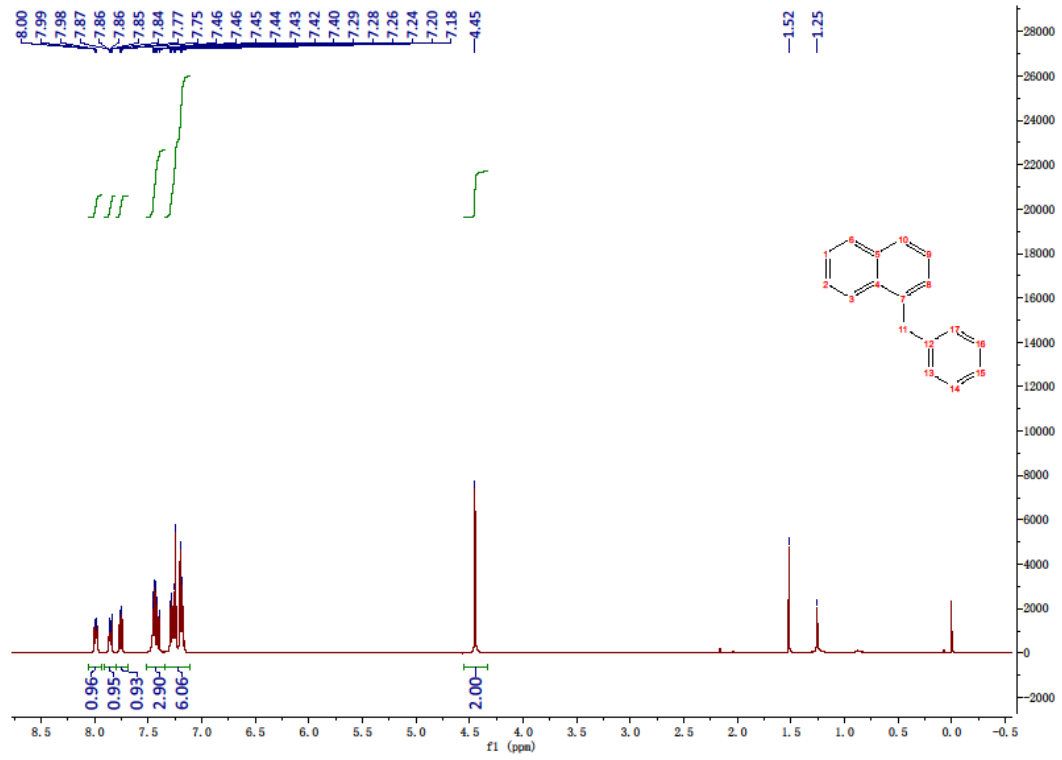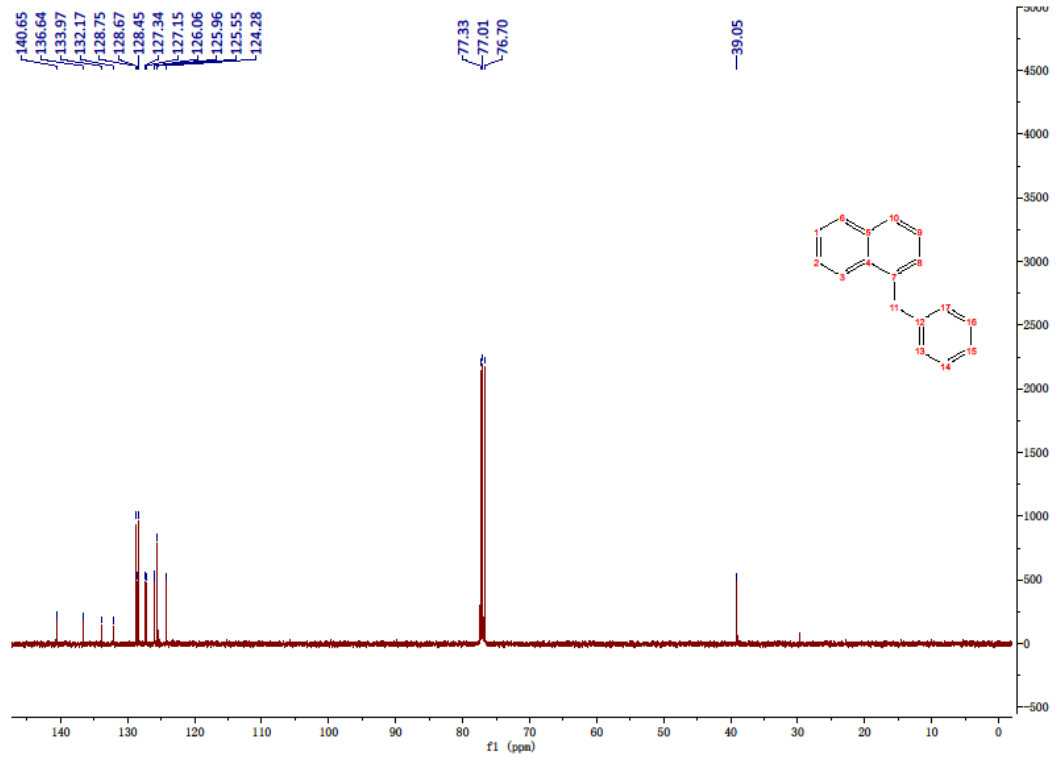

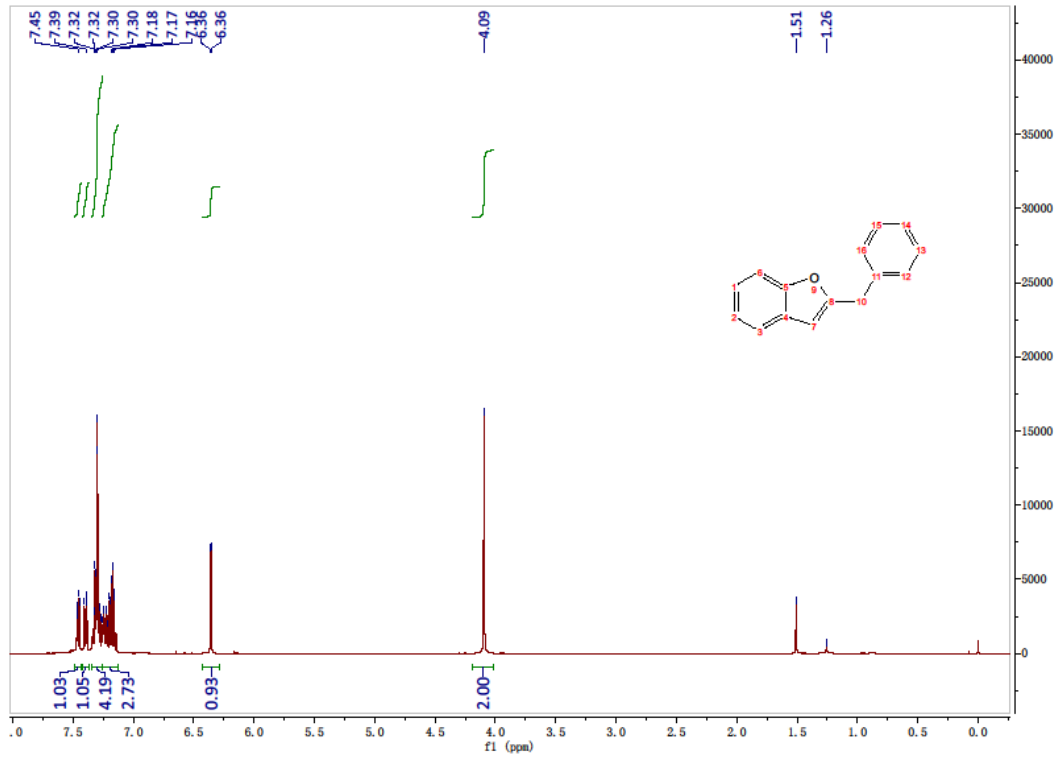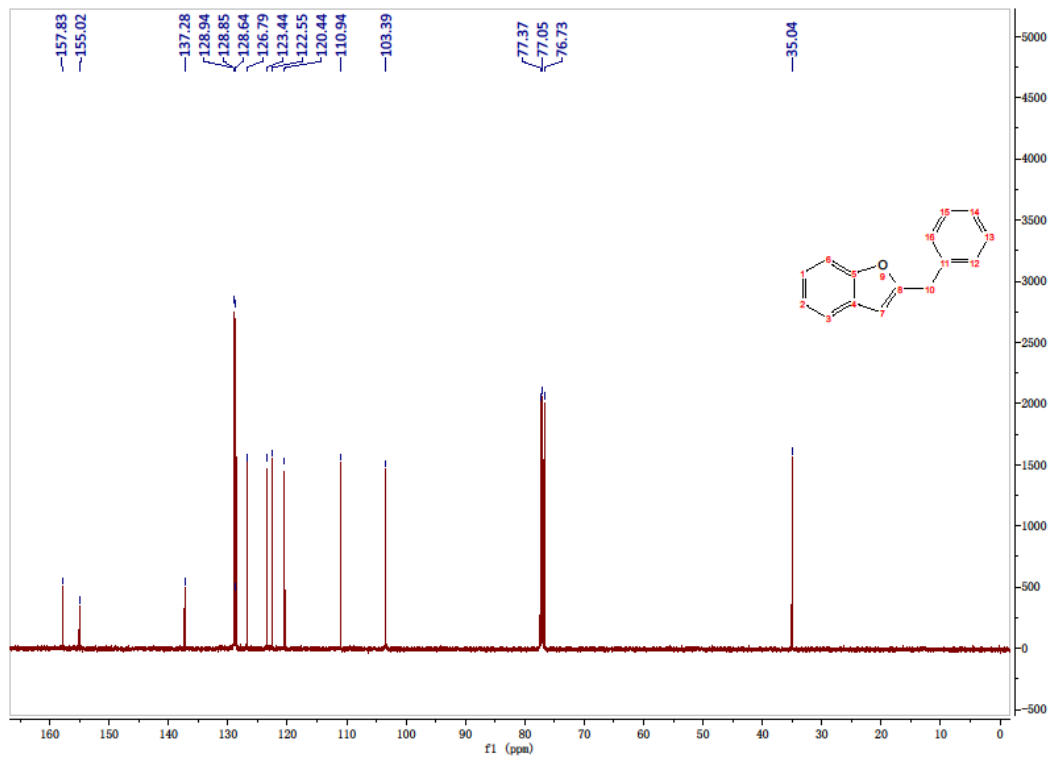

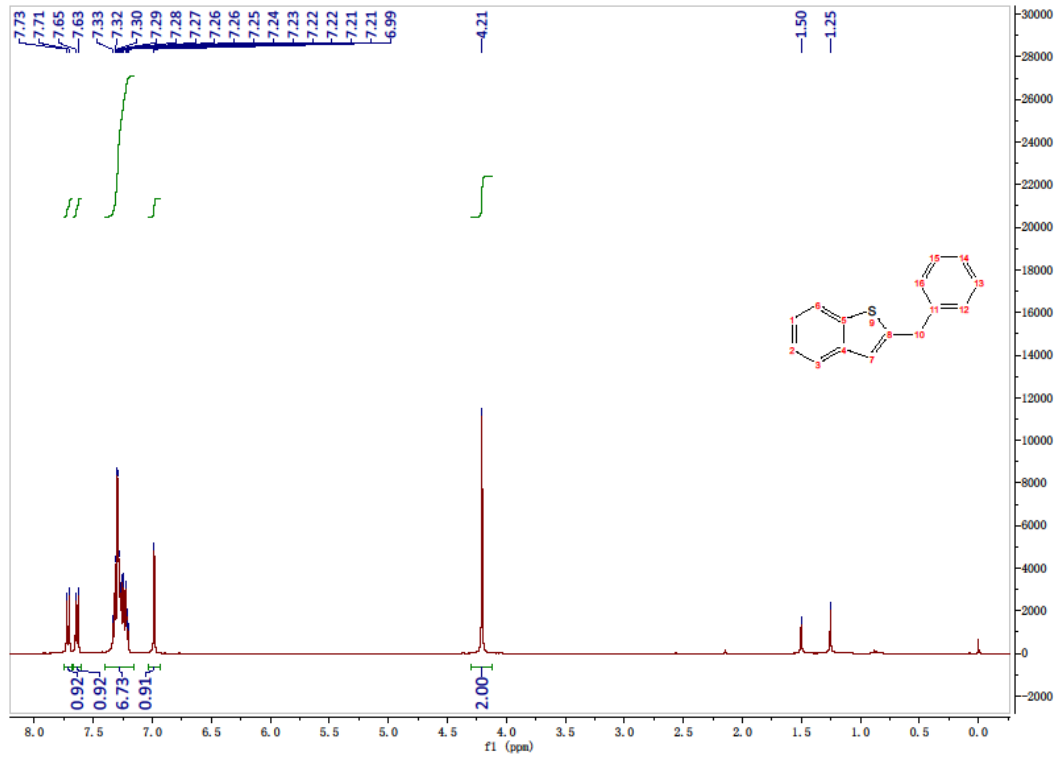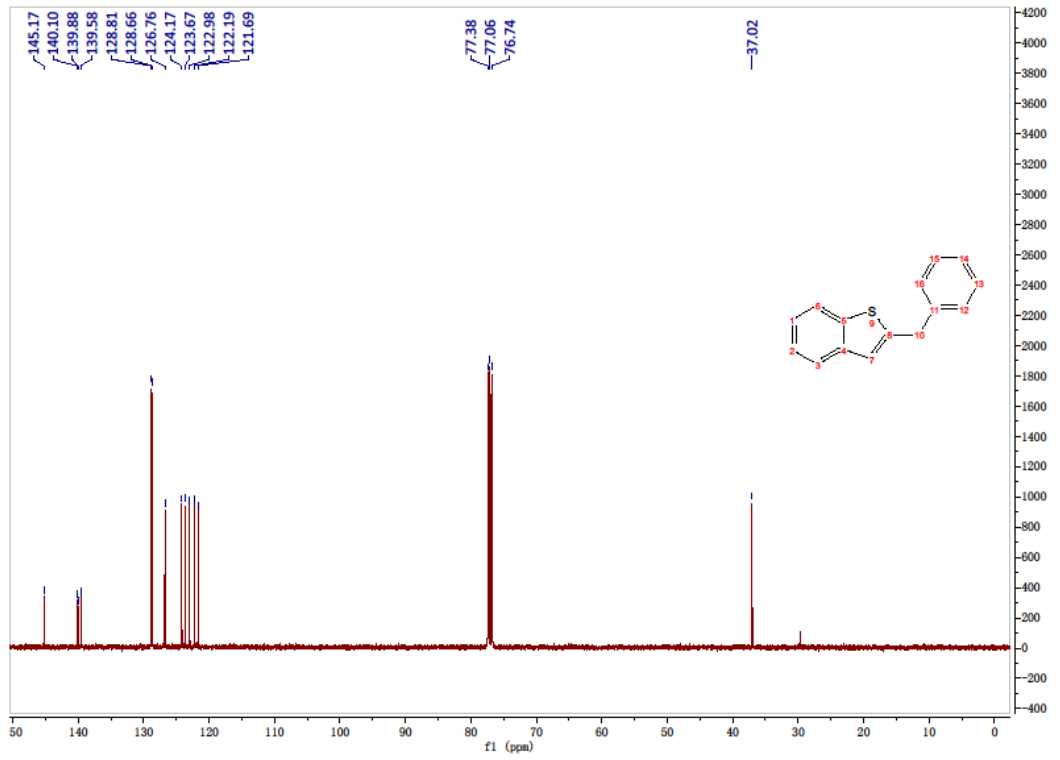



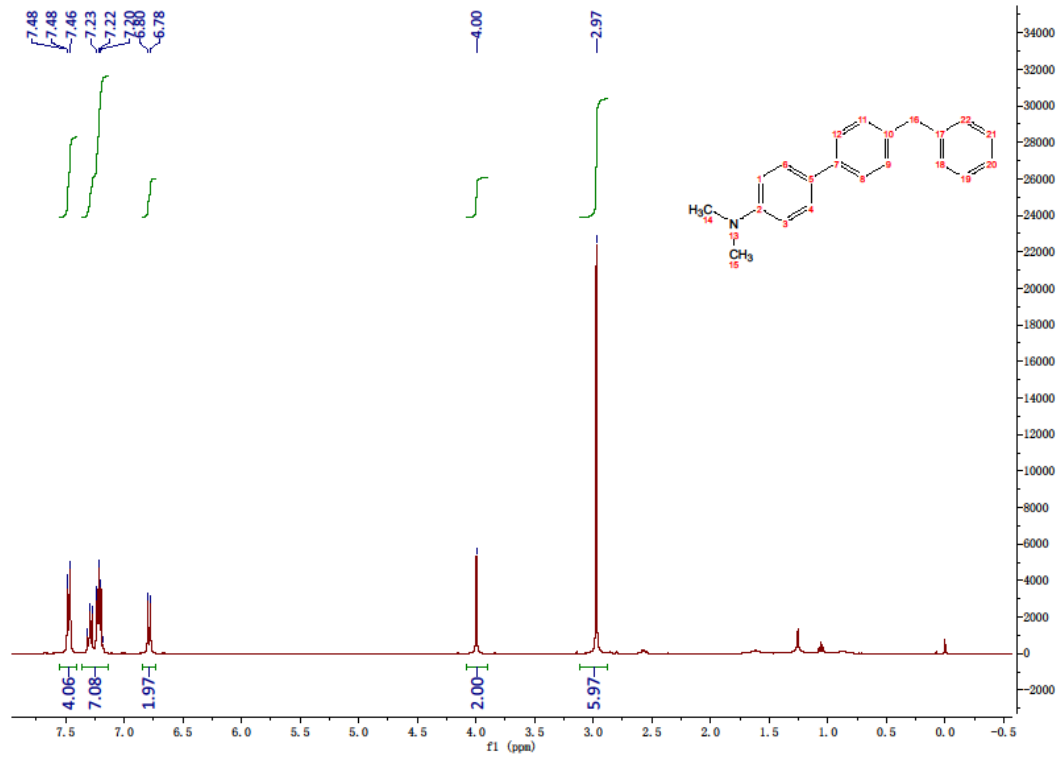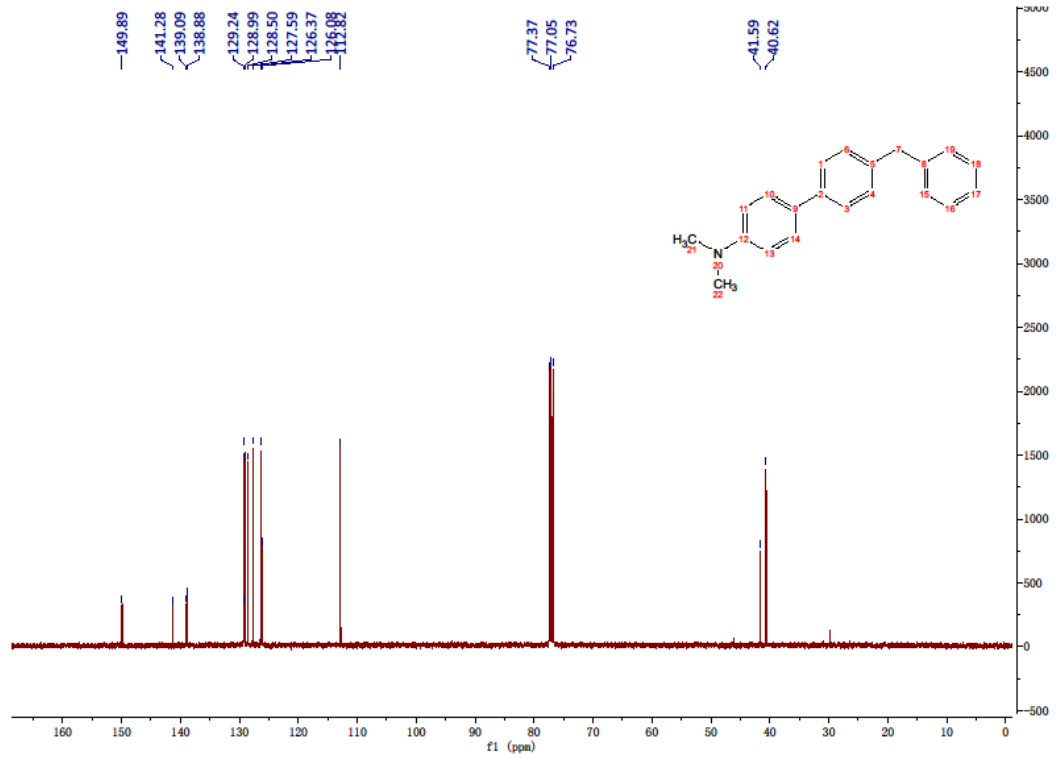

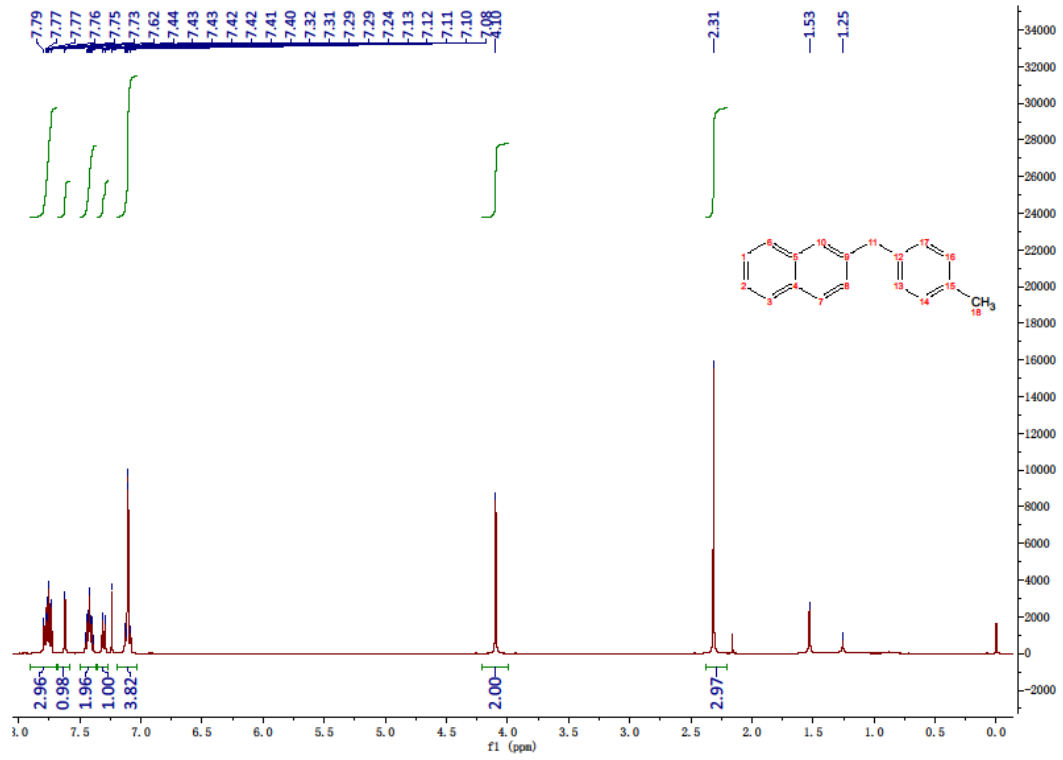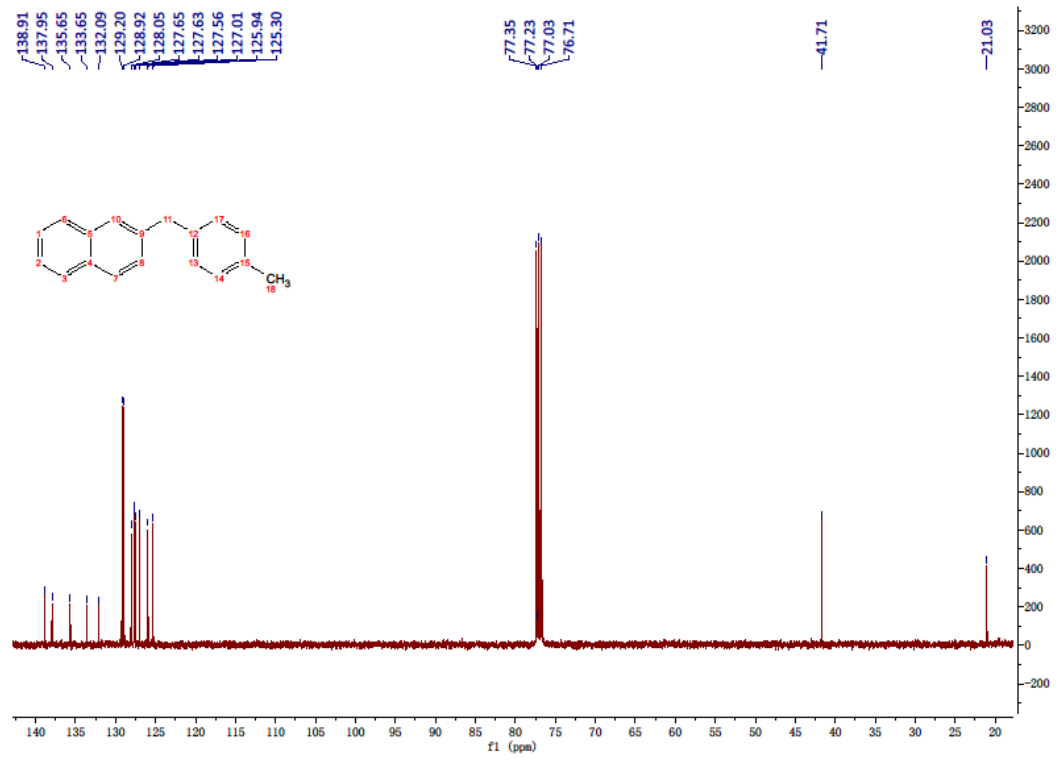

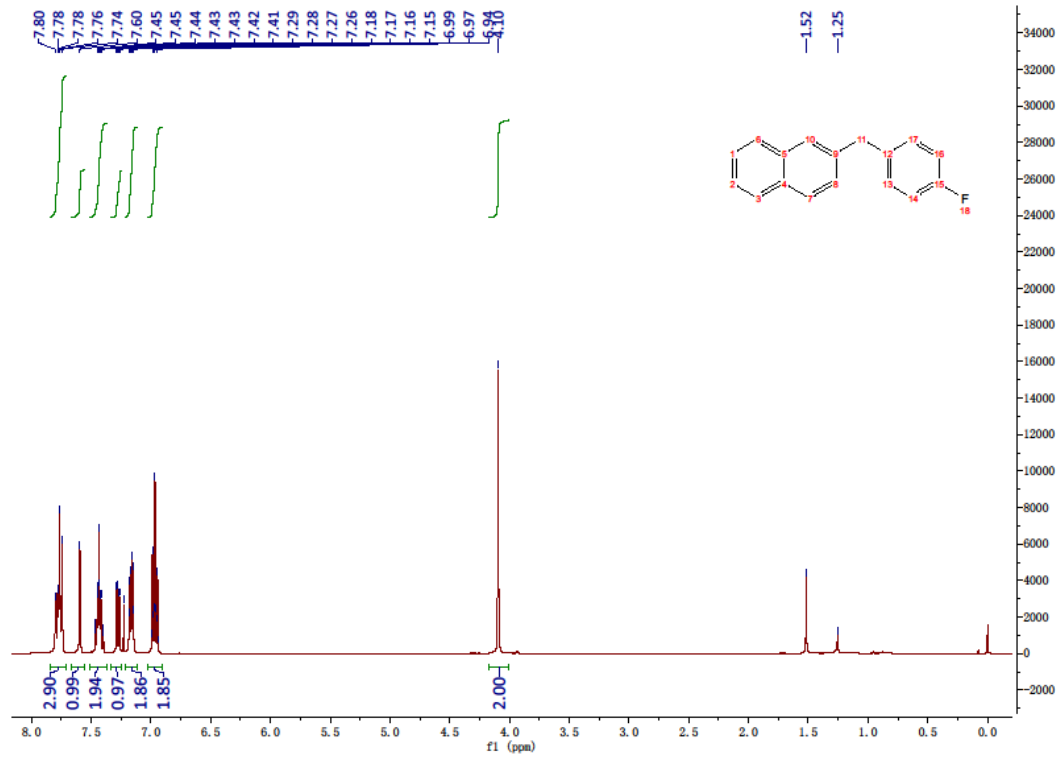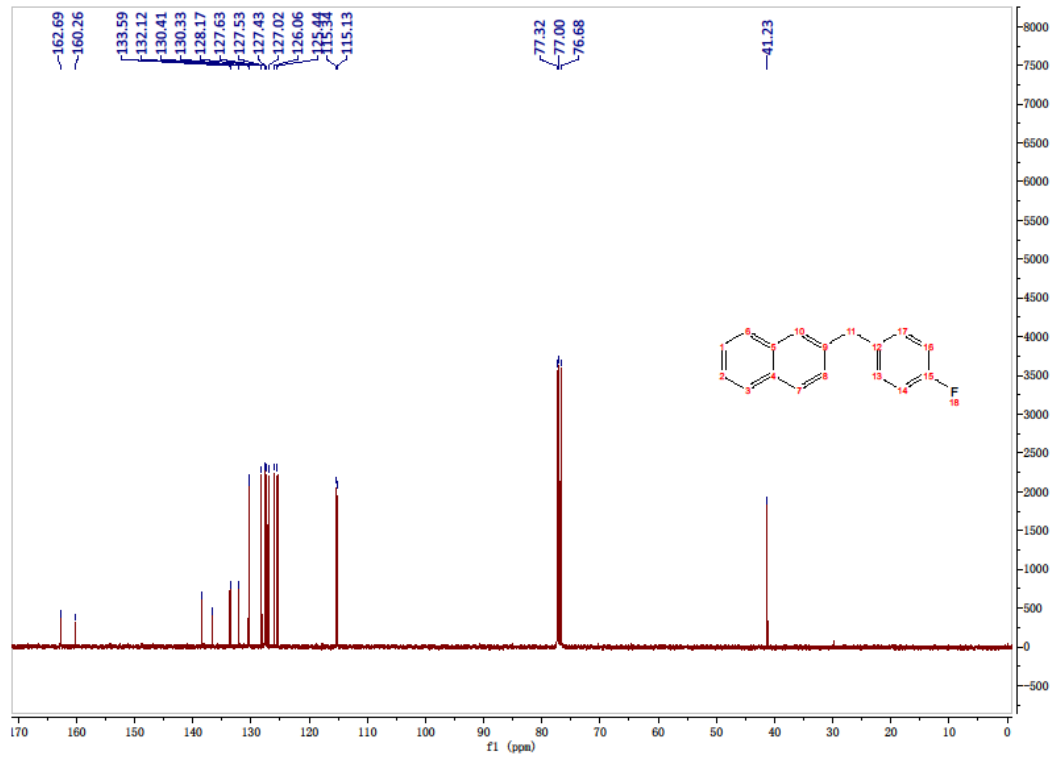

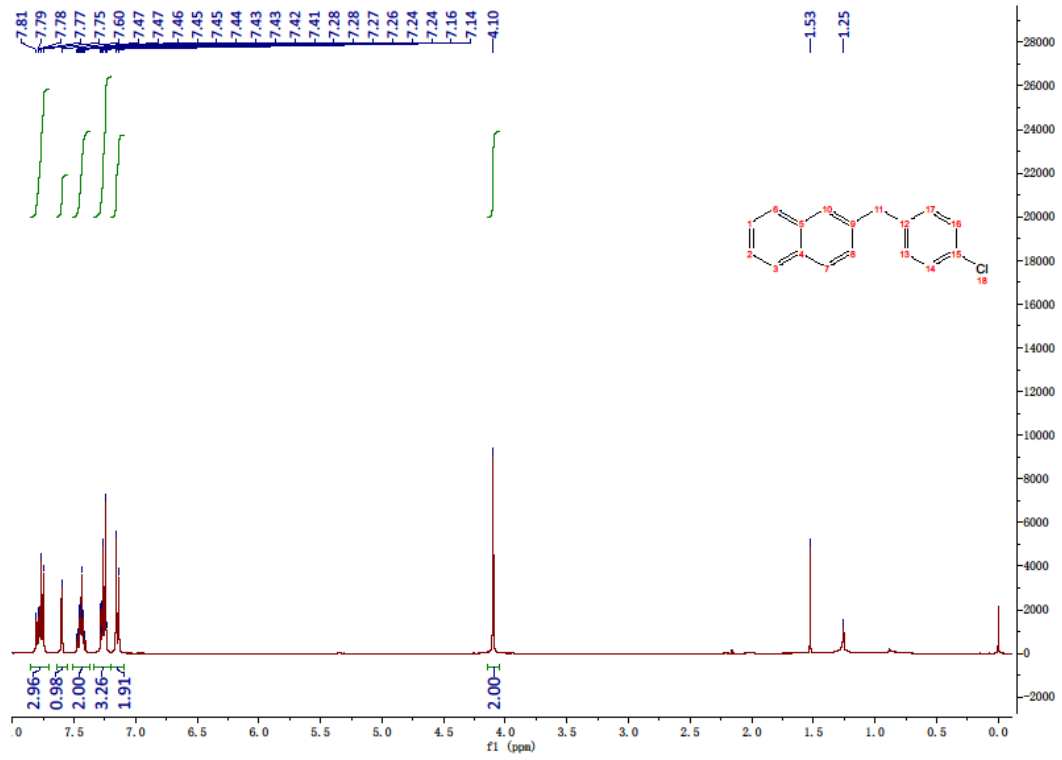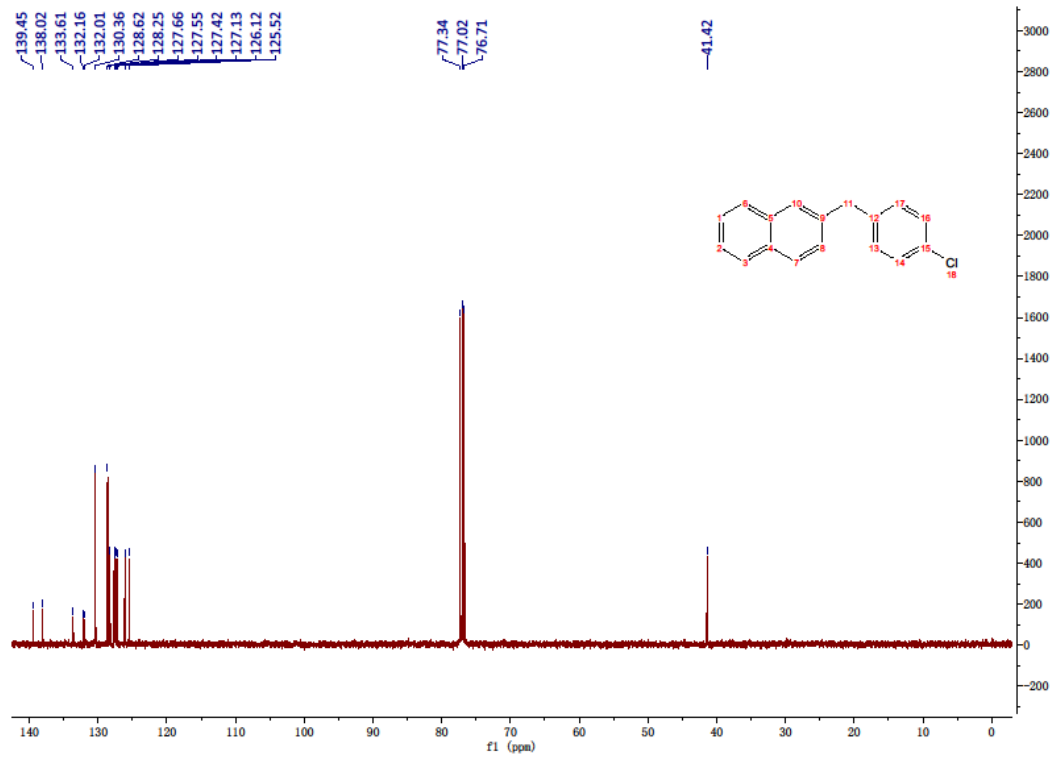

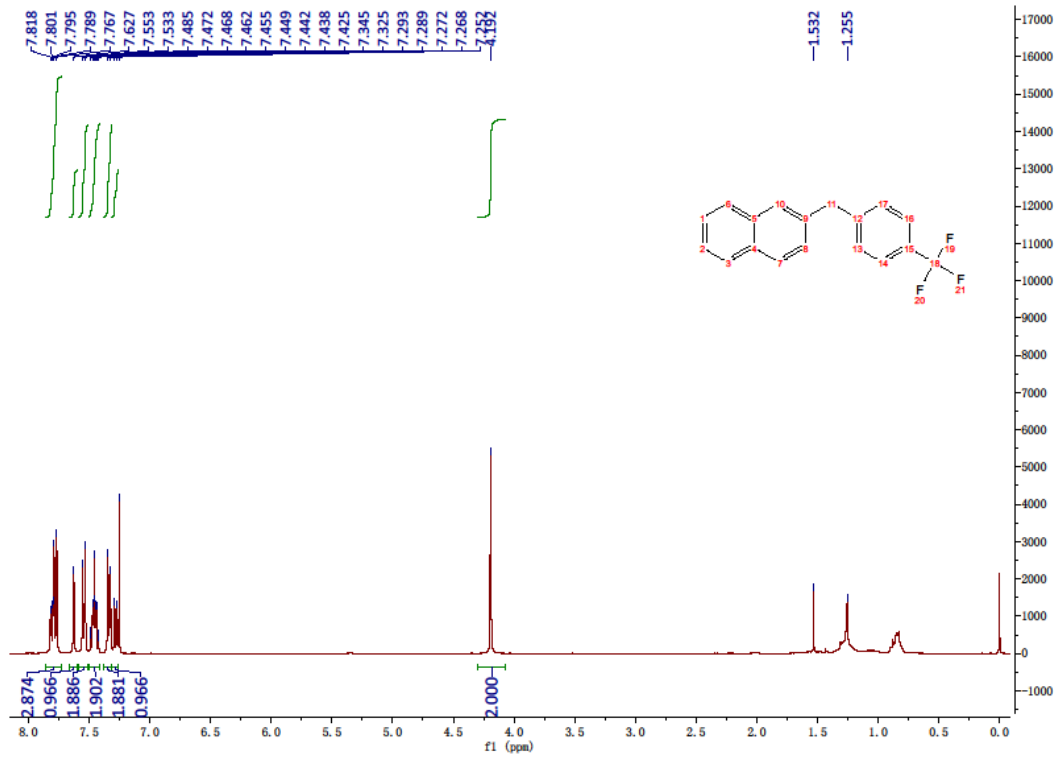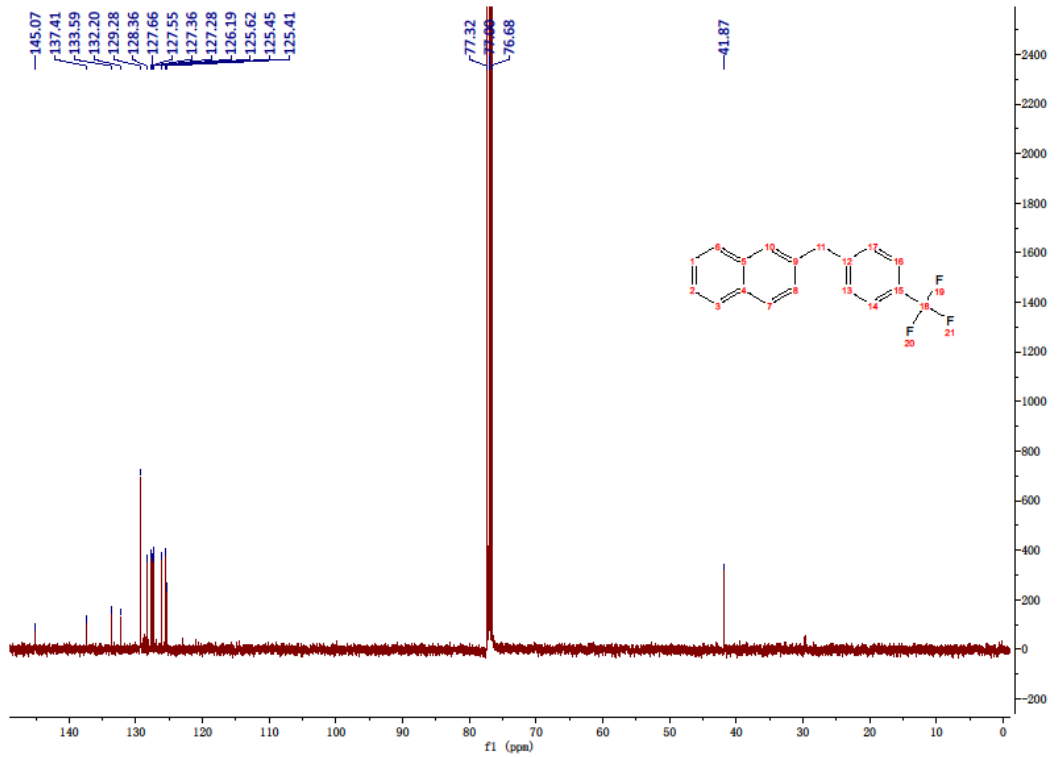

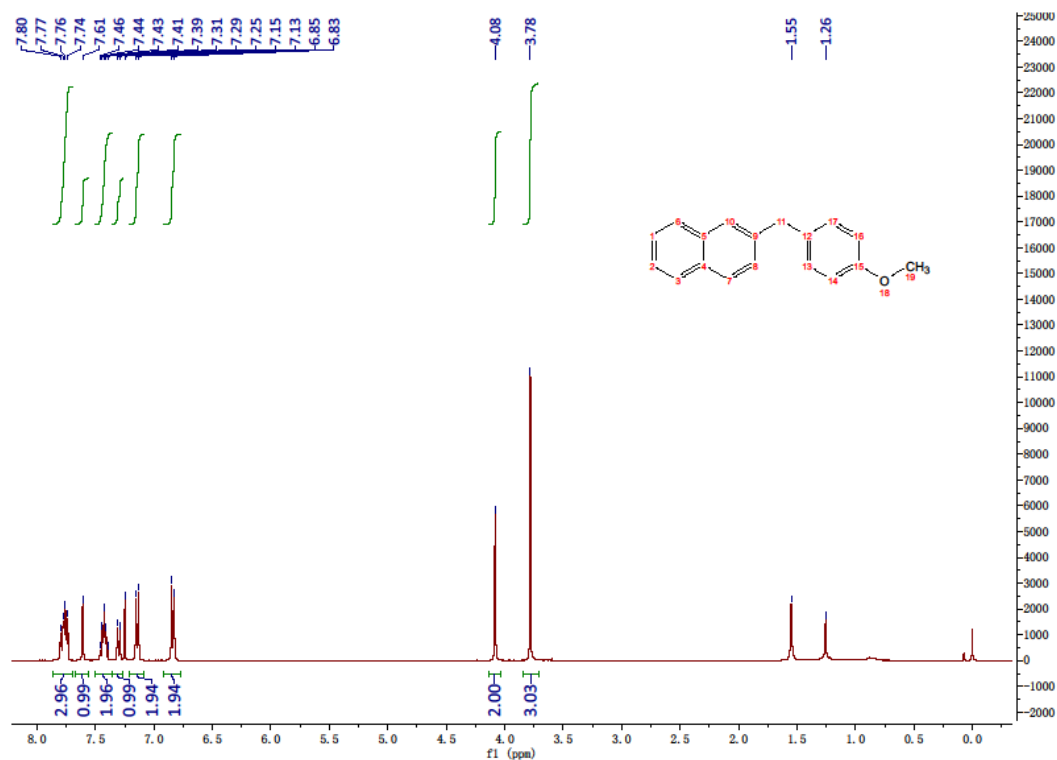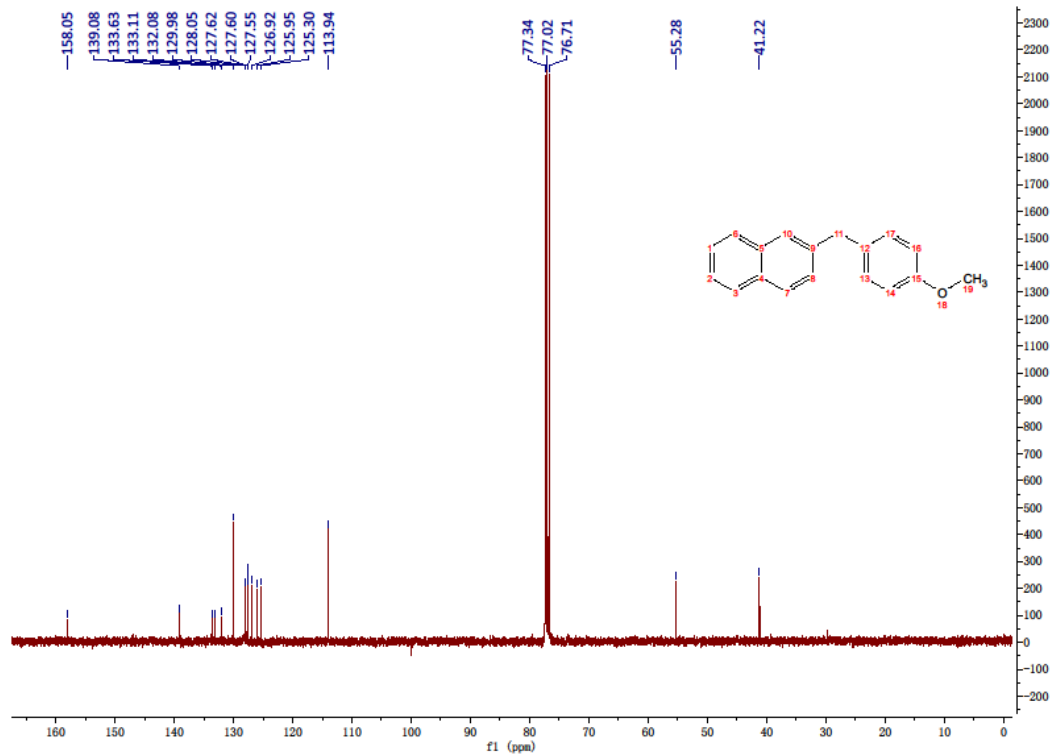

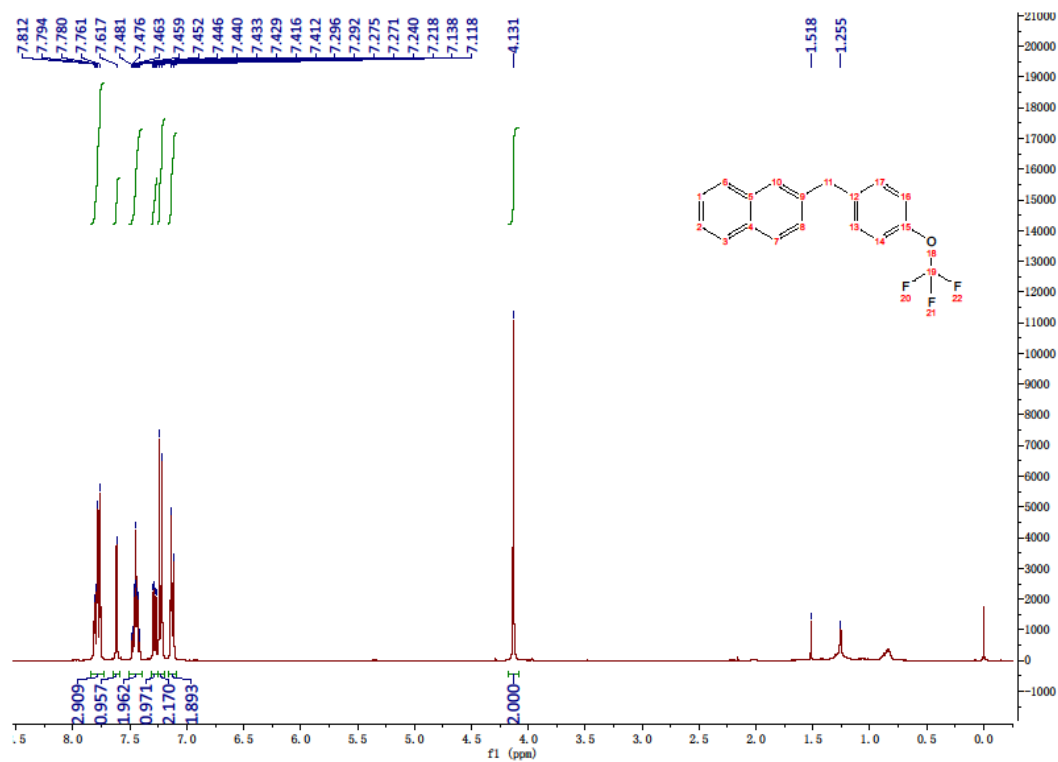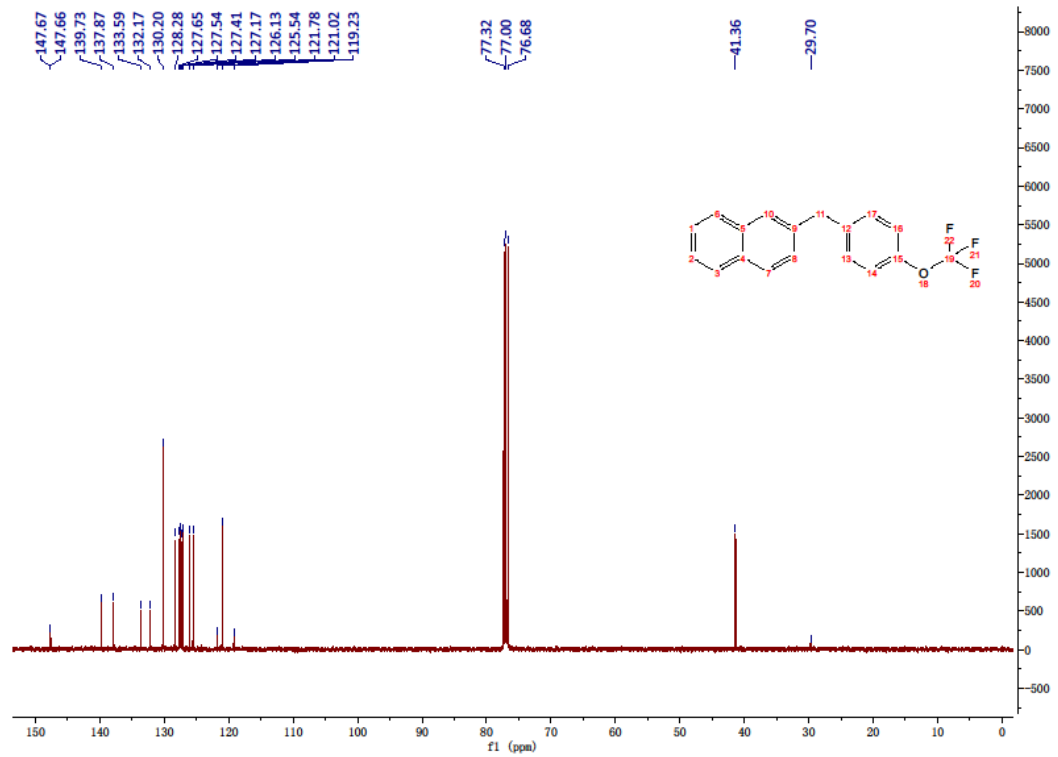

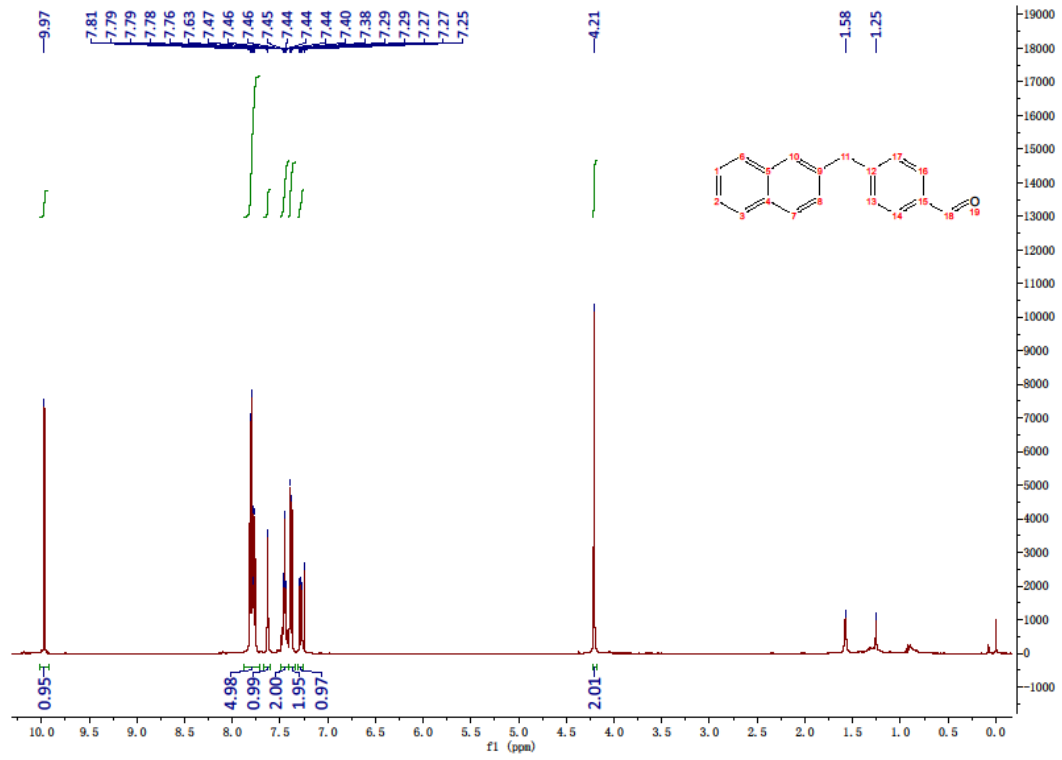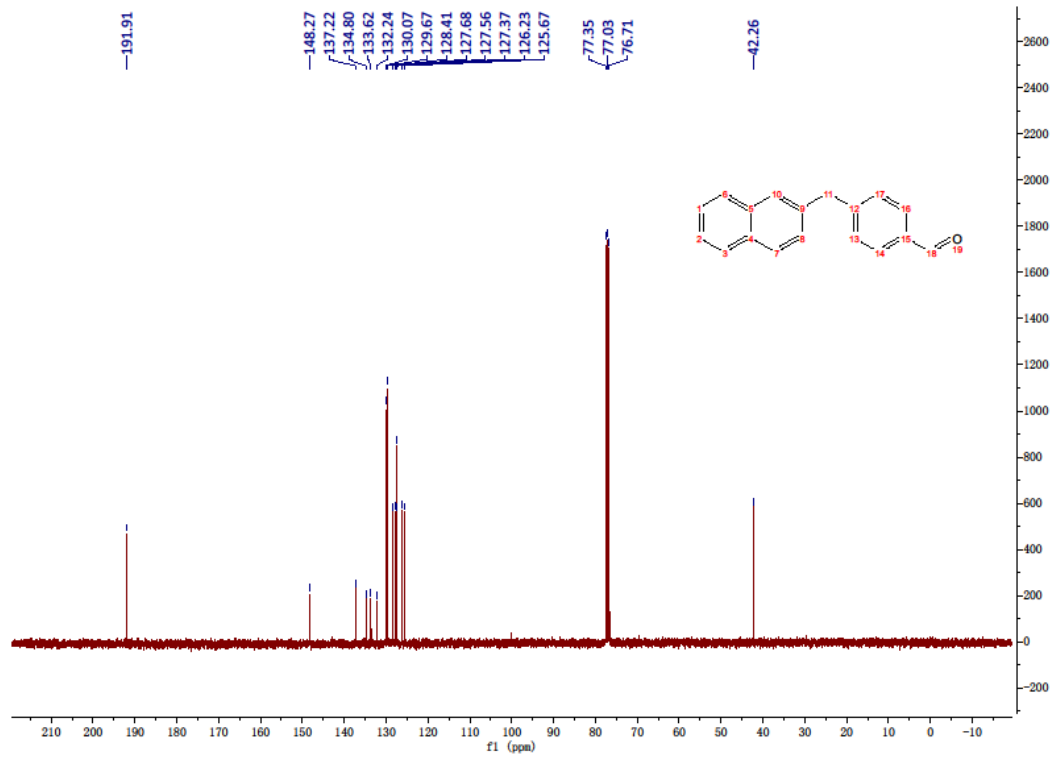



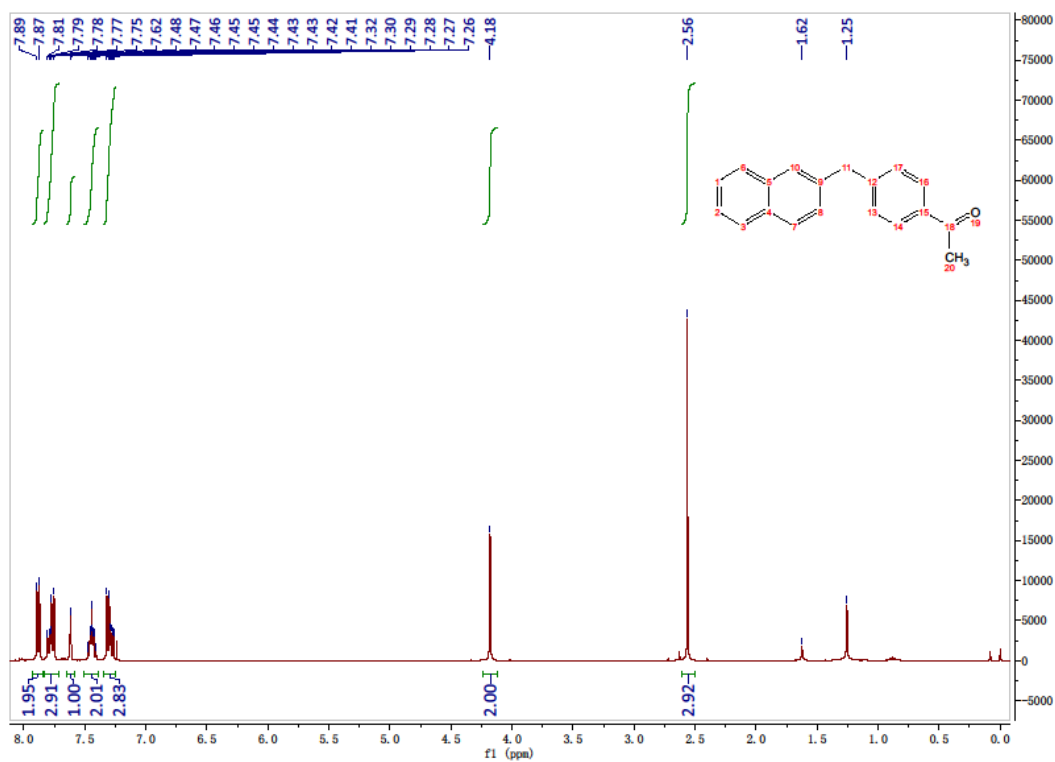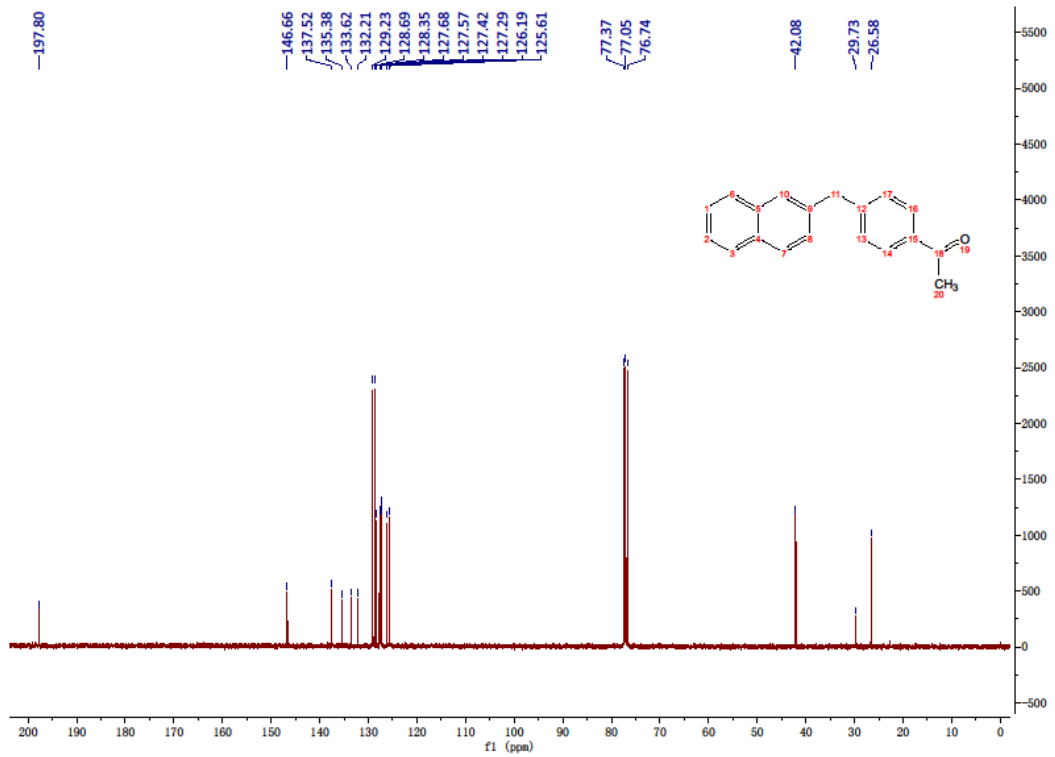

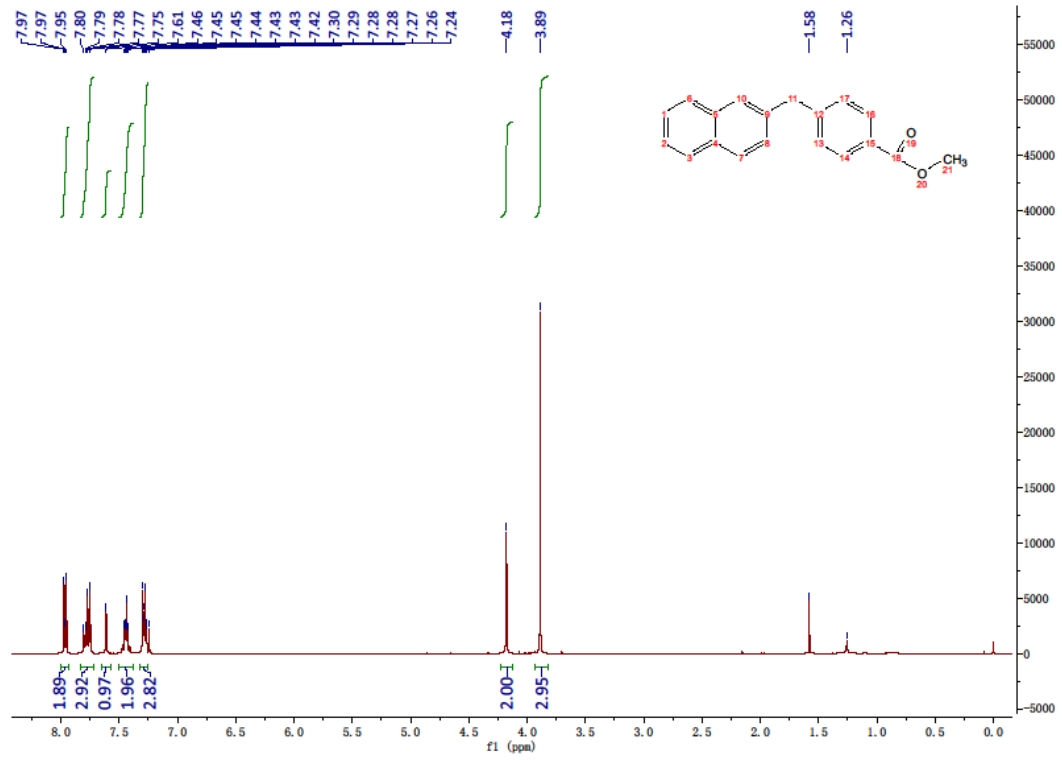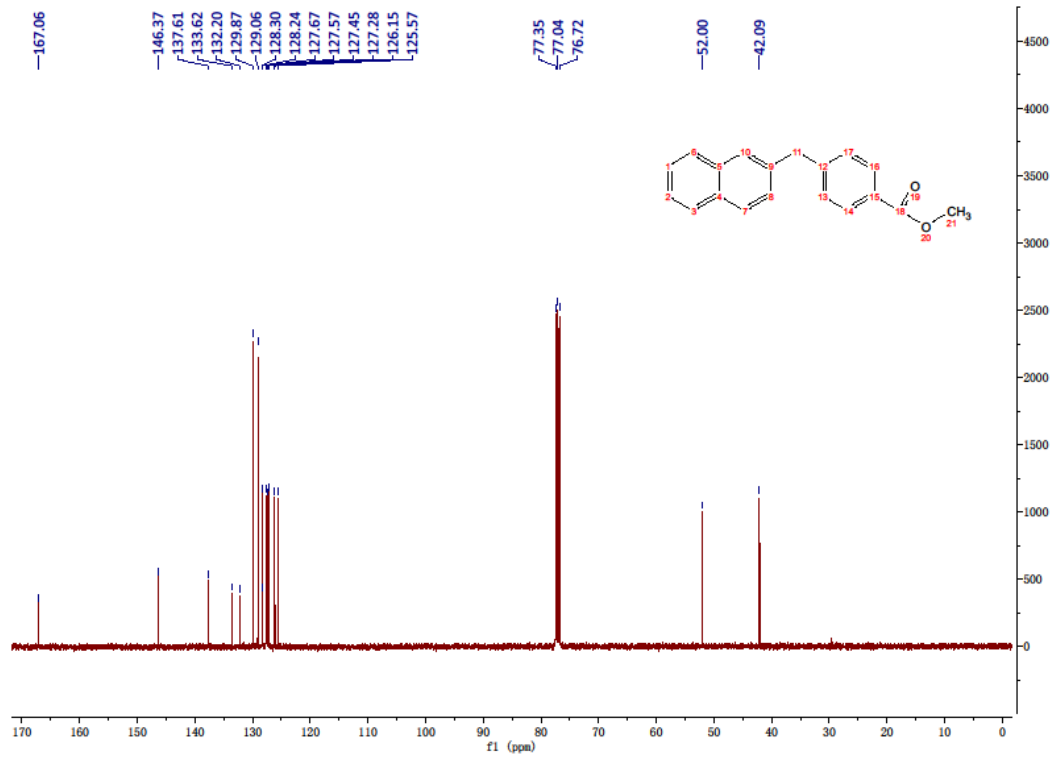

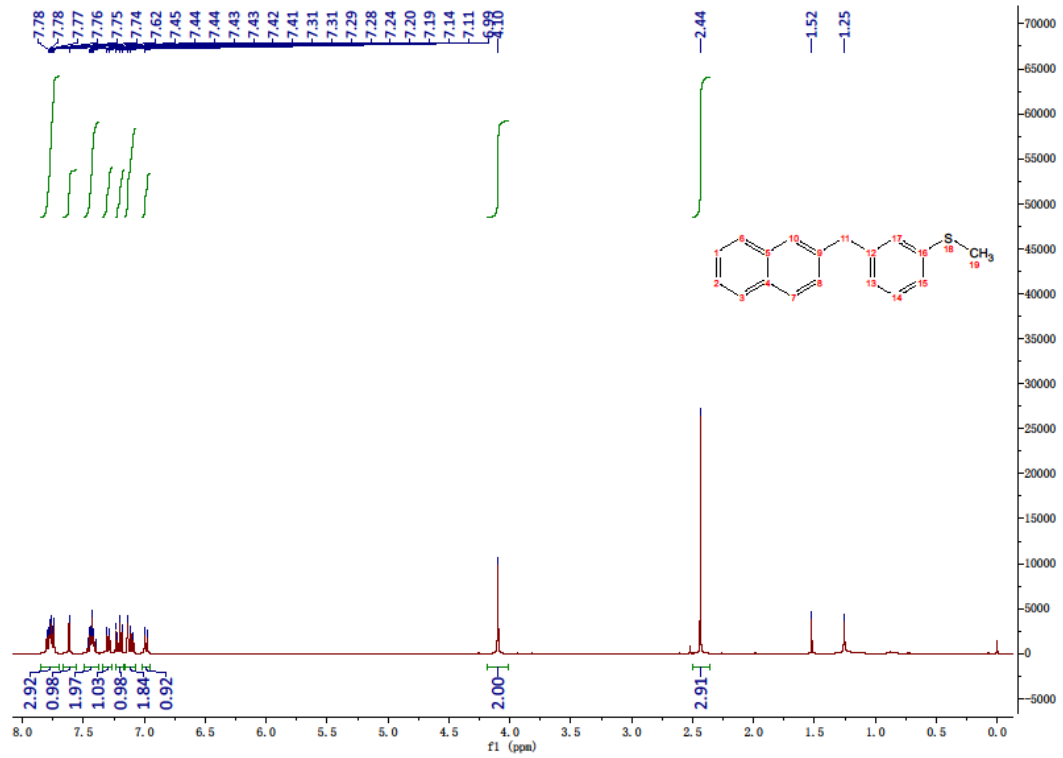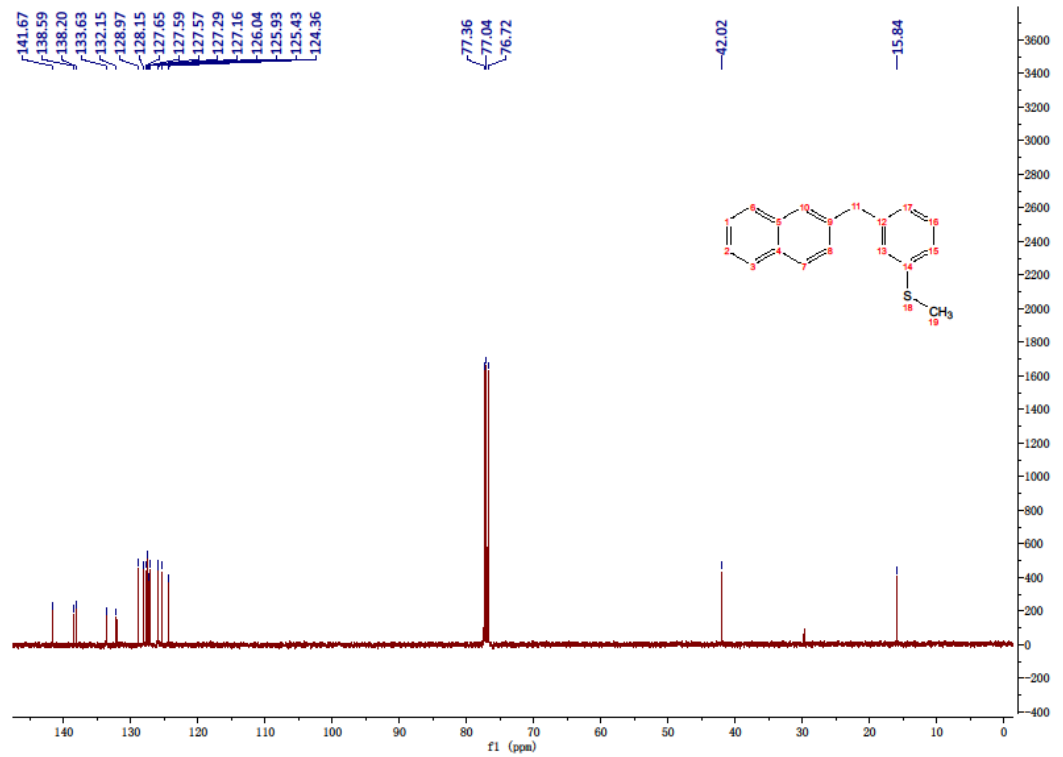

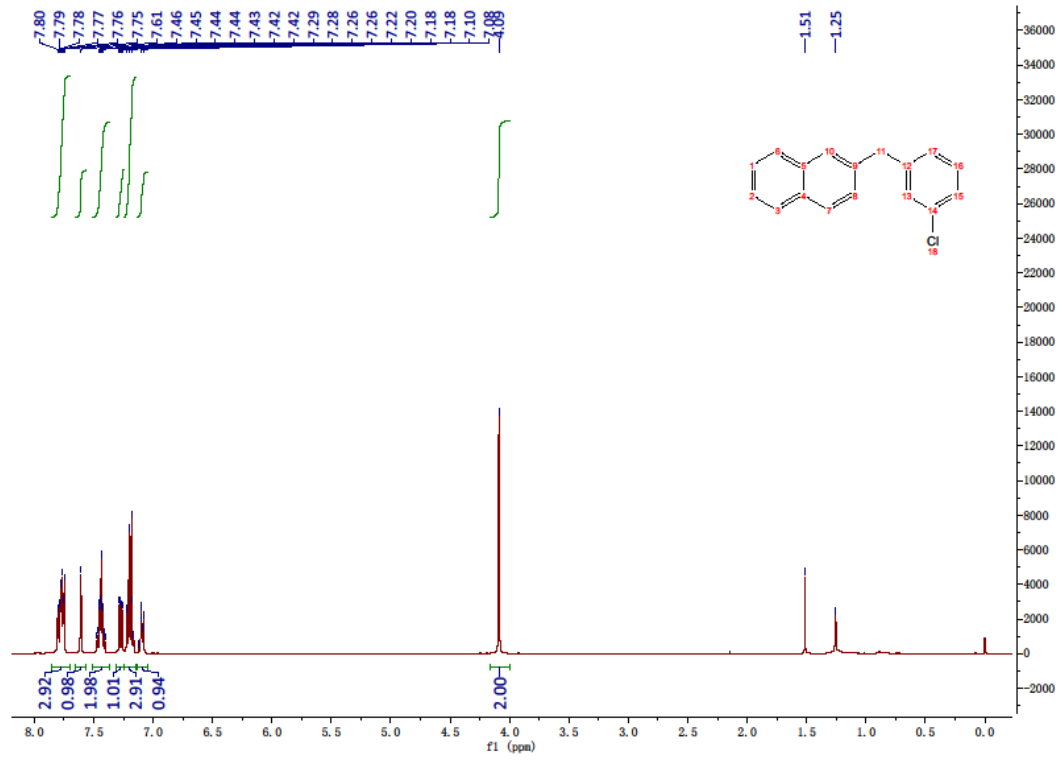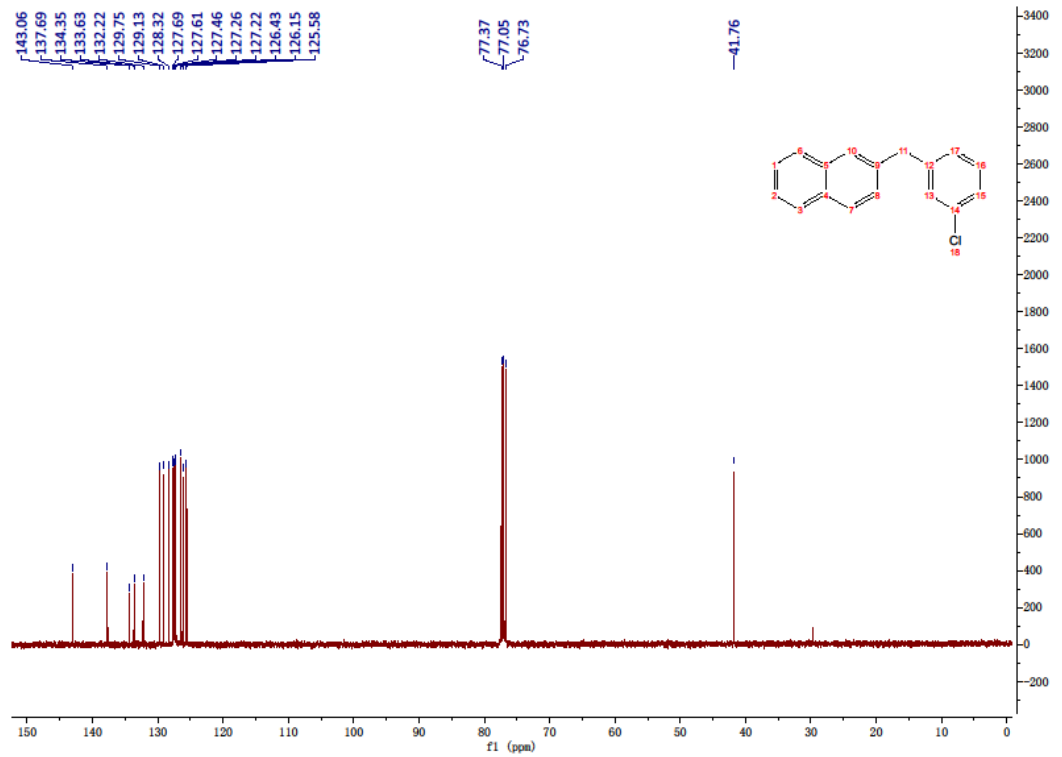

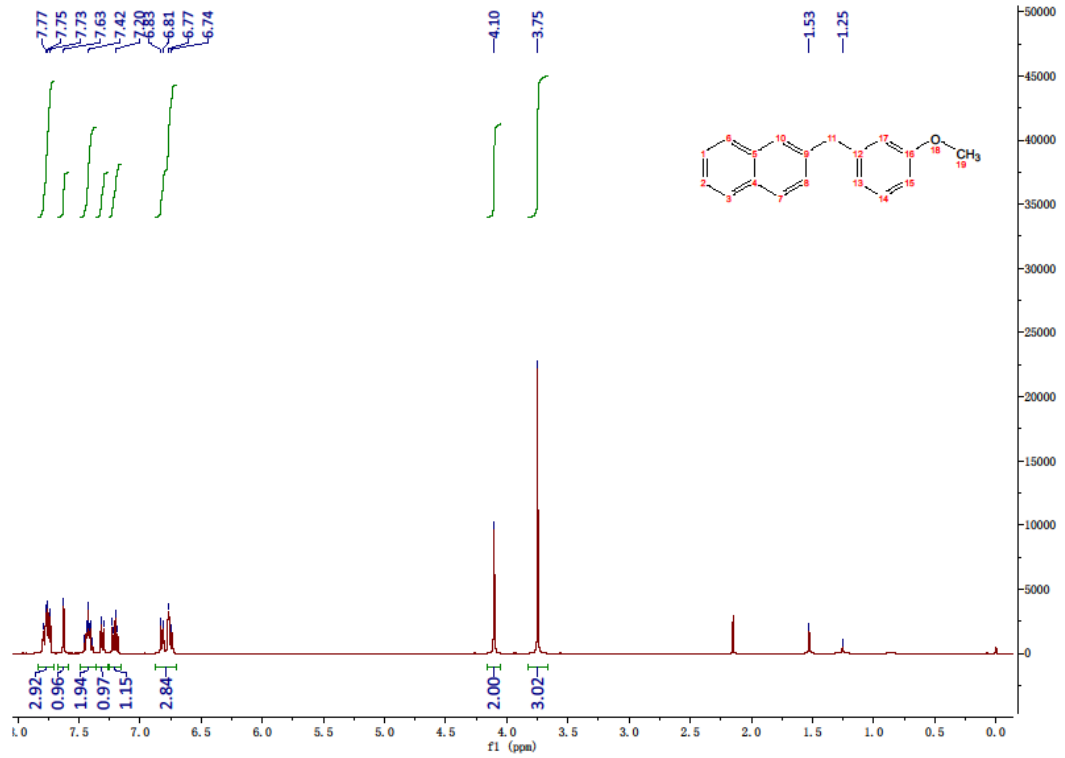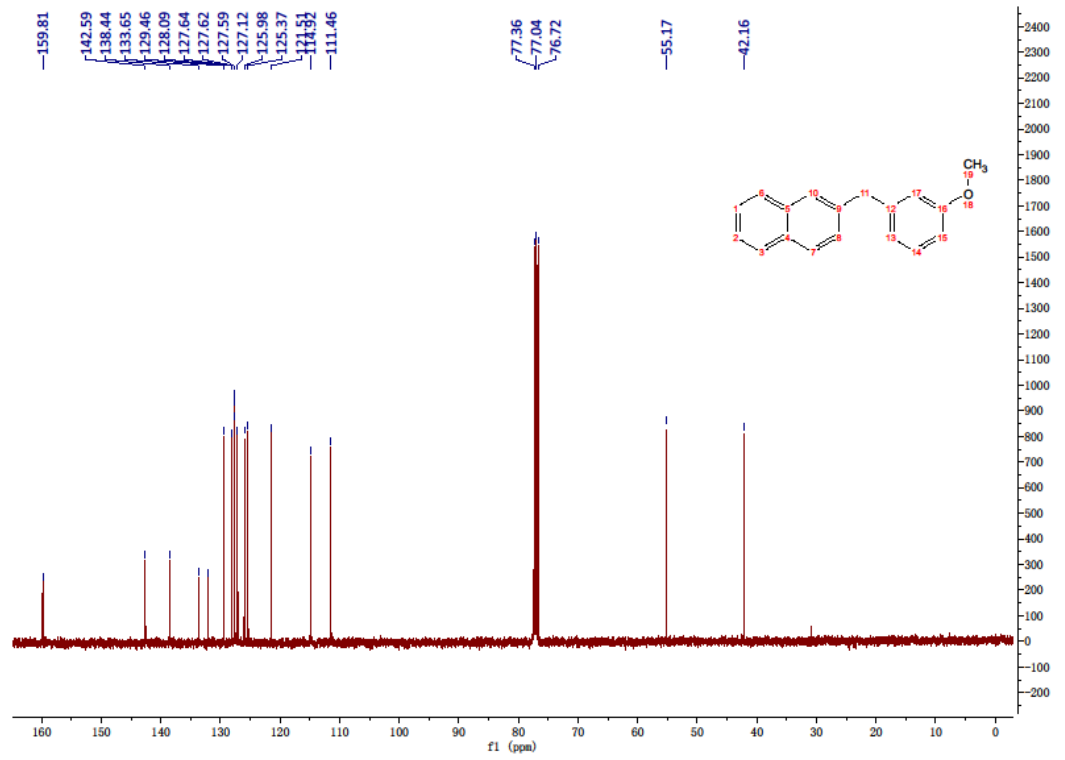

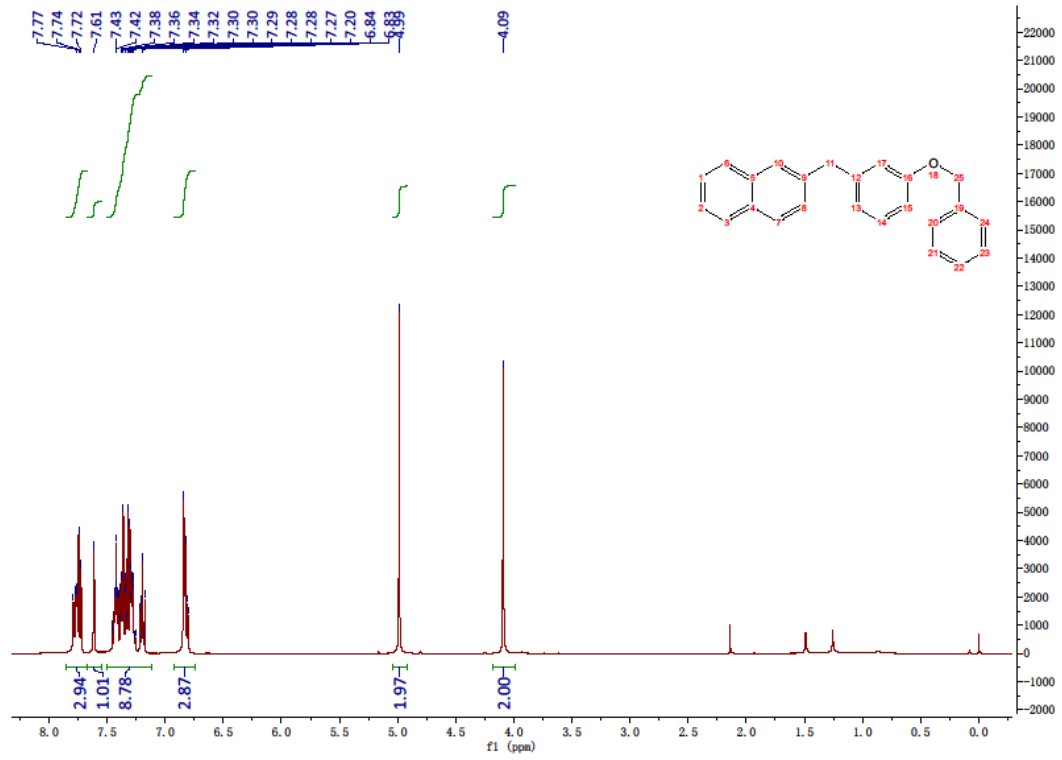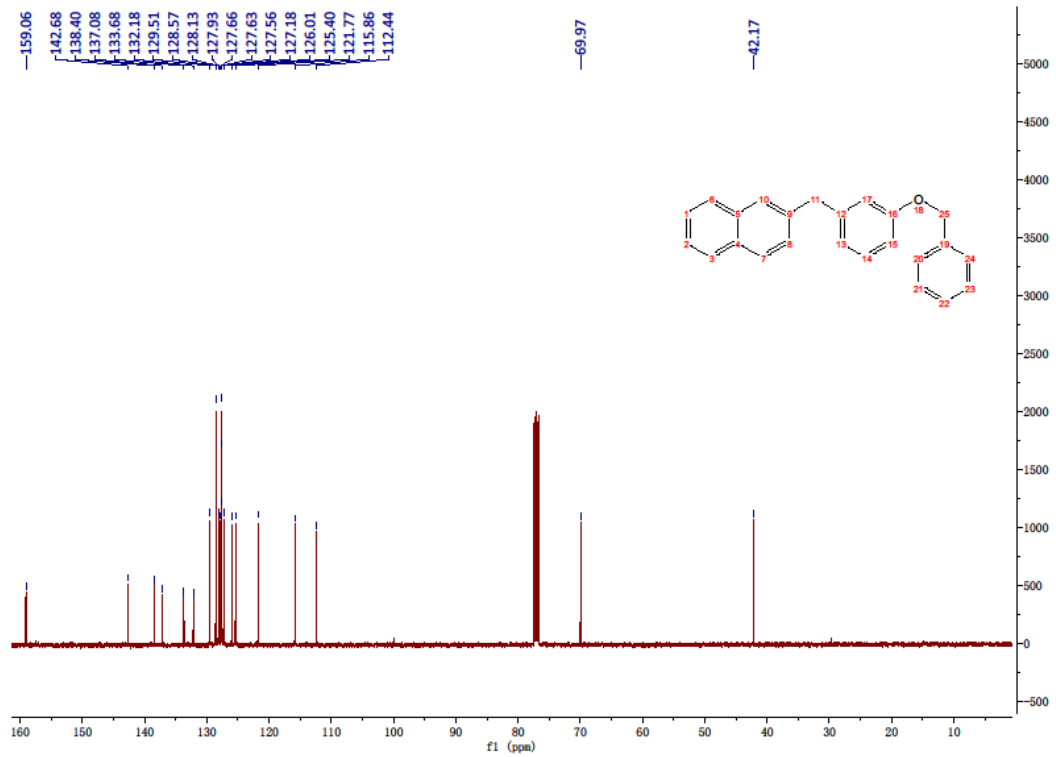

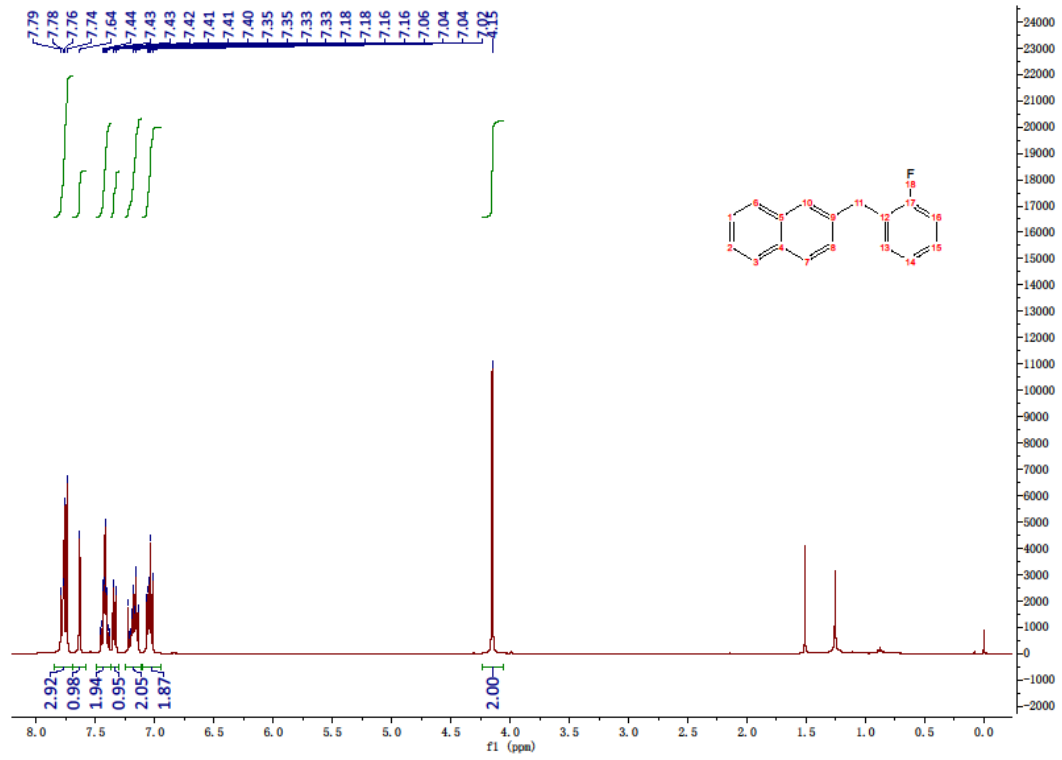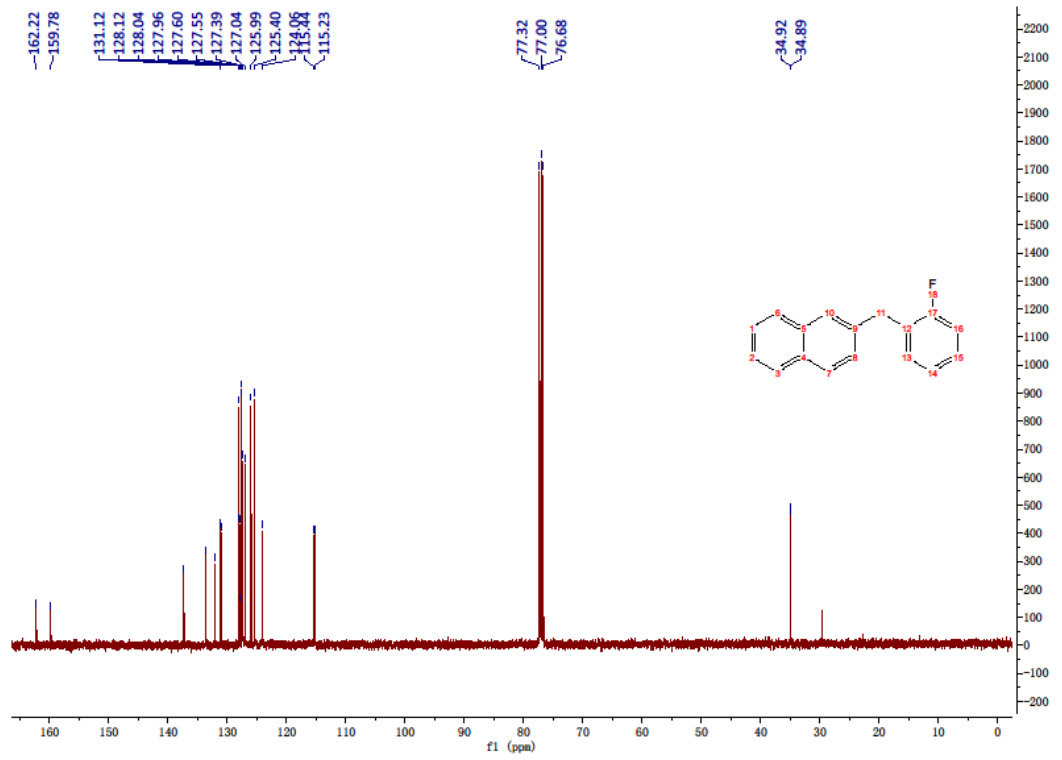

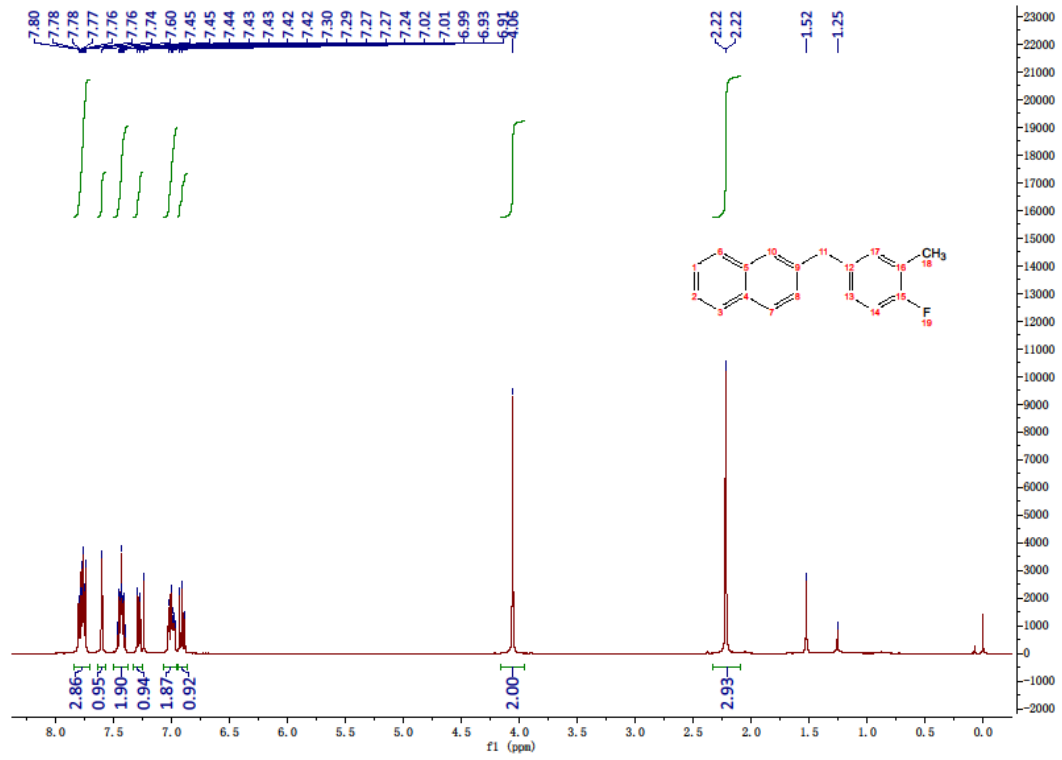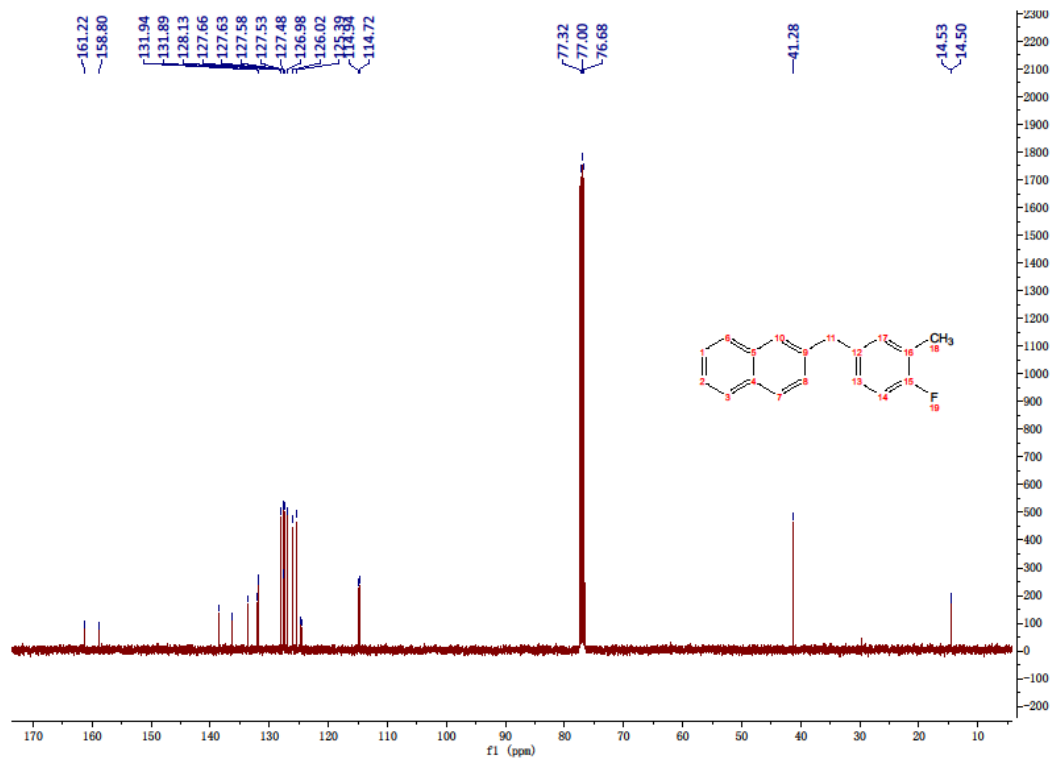



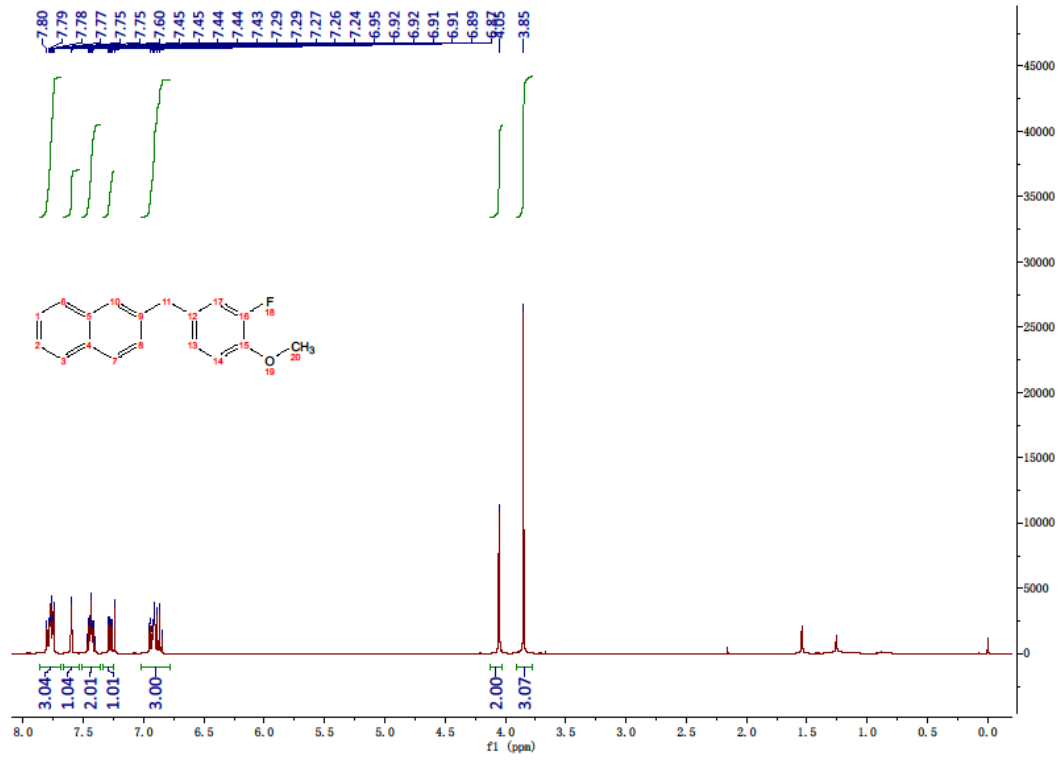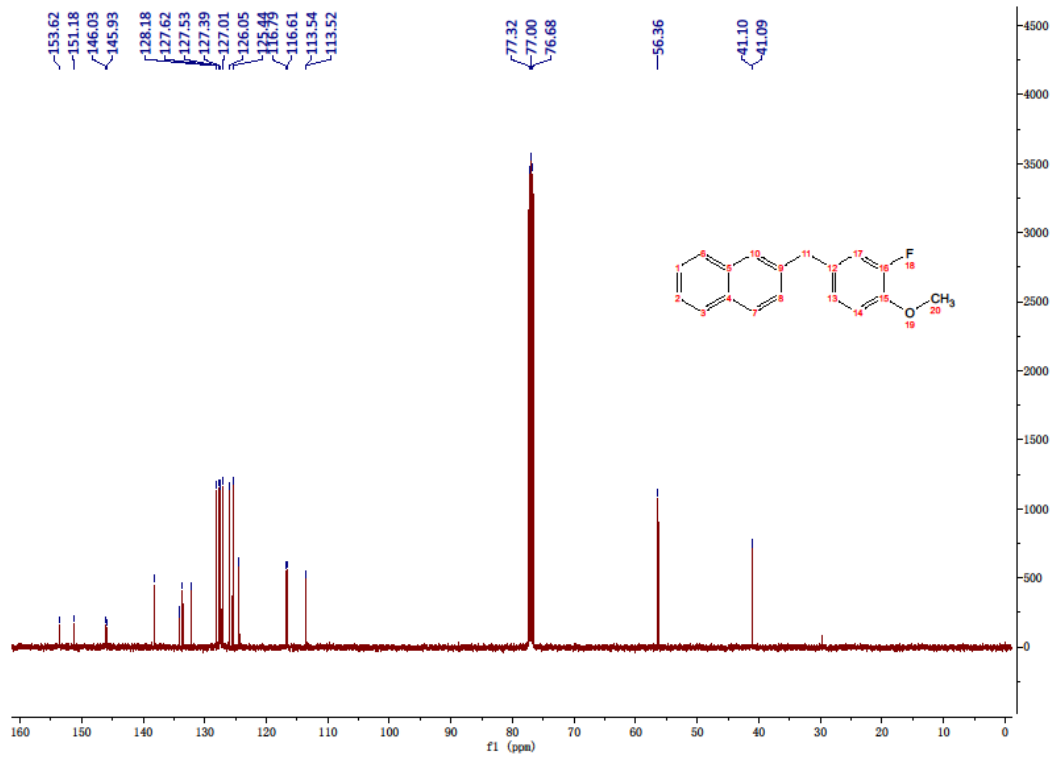

Supplement: c4cc10084k1.pdf [file c4cc10084k1.pdf]
